1 **Title:** Artisanal and farmers bread making practices differently shape fungal species diversity in French  
2 sourdoughs

3  
4 **Running title:** Bread making practices as a driver of yeast species diversity

5  
6 **Authors**

7 Elisa Michel<sup>\*†</sup>, Estelle Masson<sup>‡</sup>, Sandrine Bubbendorf<sup>‡</sup>, Léocadie Lopicque<sup>‡</sup>, Judith Legrand<sup>§</sup>, Stéphane  
8 Guézenec<sup>†</sup>, Thibault Nidelet<sup>†</sup>, Thérèse Marlin<sup>†</sup>, Olivier Rué<sup>¶</sup>, Bernard Onno<sup>\*</sup>, Delphine Sicard<sup>†</sup> and the  
9 participating bakers<sup>#</sup>

10

11 **Authors affiliation**

12 \*Oniris, Laboratoire MicrobioTech, UMR GEPEA 6144, Rue de la Géraudière CS 82225, 44322 Nantes  
13 Cedex 3, France

14 <sup>†</sup>SPO, Inra, Univ. Montpellier, Montpellier SupAgro, 2 place Pierre Viala, 34090 Montpellier, France

15 <sup>‡</sup>Laboratoire de Psychologie : Cognition, Comportement, Communication – EA 1285, Université de  
16 Bretagne Occidentale, 20 rue Duquesne, CS 93837, F-29238 Brest 03, France

17 <sup>§</sup>Génétique Quantitative et Evolution-Le Moulon, INRA, Université Paris-Sud, CNRS, AgroParisTech,  
18 Université Paris-Saclay, 91190 Gif-sur-Yvette, France

19 <sup>¶</sup>MaIAGE, INRA, Université Paris-Saclay, Jouy-en-Josas, France

20 <sup>#</sup>Bakers and farmers

21

22 **Corresponding author** Delphine Sicard, SPO, Inra, Univ. Montpellier, Montpellier SupAgro,  
23 Montpellier, France +33 4 99 61 24 60 [delphine.sicard@inra.fr](mailto:delphine.sicard@inra.fr)

24

25

26

27 No competing interests

28

29 Financial supports: French National Research Agency (ANR-13-ALID-0005) and INRA

## 30 **Abstract**

31 Preserving microbial diversity in food systems is one of the many challenges to be met to  
32 achieve food security and quality. However, there is still a lack of knowledge about the factors that may  
33 influence food microbial diversity, notably in fermented foods. Although industrialization led to the  
34 selection and spread of specific fermenting microbial strains, there are still ongoing artisanal processes  
35 that may allow the conservation of a wider diversity of microbial species. We examined whether the  
36 diversity of artisanal practices could lead to an increased level in fungal species diversity for bread  
37 making. We used an interdisciplinary participatory research approach including bakers, psycho-  
38 sociologists and microbiologists to analyse French bread making practices and describe fungal  
39 communities in naturally fermented sourdough. Bread making practices were clustered in a farmer  
40 practices' group and an artisanal practices' group. Surprisingly, the well-known bakery yeast,  
41 *Saccharomyces cerevisiae*, was dominant (i.e. with a relative abundance over 50%) in only 24% of  
42 sourdoughs and other yeast species of the closely related *Kazachstania* genus were frequent. Bread  
43 making practices were found to drive the distribution of these species. The differences in fungal  
44 communities were associated with variation in sourdough acidity, maltose concentration and hydration.  
45 Overall, our results showed that preserving bread making practices diversity allows the preservation of  
46 a higher taxonomic and functional diversity in microbial communities.

47

## 48 **Introduction**

49 Humans started to ferment food before the emergence of the Neolithic using naturally  
50 fermenting microbial communities. In the 19<sup>th</sup> century, the industrialization and the increase of  
51 knowledge in microbiology resulted in changes in fermented food practices with the use of targeted  
52 species and selected strains. This selection led to a reduction in species and genetic diversity for  
53 fermented food processing and limited *in situ* conservation of microbial communities in industrialized  
54 systems. Domestication of the yeast *Saccharomyces cerevisiae* for the production of beer, wine, cheese,  
55 leavened bread or that of the fungus *Penicillium roquefortii* for blue cheese production are well studied  
56 cases [1–5]. Recently, in response to global changes, there is a renewed interest in artisanal practices

57 that make use of naturally fermenting microbial communities. However, the effect of artisanal practices  
58 on the distribution of microbial species diversity remains poorly documented. Thus, understanding  
59 whether and how artisanal practices may promote microbial diversity is a first step toward the  
60 development of food systems with improved sustainability.

61         Among fermented foods, bread is still a symbol deeply engrained in the history, religious rites  
62 and medicine of several cultures. The origin of bread likely originated 14 000 years ago, suggesting  
63 bread was made long before plant domestication [6]. Since the Neolithic, bread history is intimately  
64 combined with the evolution of cereals, bread making associated tools and the advent of Mediterranean  
65 civilizations [7]. Leavened bread was traditionally made with flour, water and a fermenting agent, which  
66 was either a fermenting beverage or a fermenting dough, termed sourdough [1, 8]. This sourdough was  
67 generally initiated from a mixture of flour and water, naturally colonized by lactic acid bacteria (LAB)  
68 and yeasts [1, 9]. Sourdough was then either maintained from one bread making process to the other or  
69 initiated again and again, depending on the craftsman [10, 11]. In the 19<sup>th</sup> century, yeast starters made  
70 of *S. cerevisiae*, often called « baker's yeast », were proposed as an alternative to sourdough and these  
71 are nowadays commonly used by local bakeries and industries. However, there is currently a renewed  
72 interest in the use of naturally fermented sourdoughs for bread leavening.

73         In France, sourdough breads are made both by bakers and farmer-bakers who also grow and mill  
74 their own wheat. The number of farmers-bakers has increased in the 2000s with two motives: to grow  
75 wheat varieties meeting their needs and to assert their independence from industry [12]. Although  
76 farmer-bakers are less numerous than bakers, they participate in the renewed interest in local wheat  
77 varieties and artisanal know-how, which may contribute to the conservation of both socio-cultural  
78 diversity and microbial diversity.

79         Here, we used a participatory research approach involving psycho-sociologists, microbiologists,  
80 bio-mathematicians, bakers and farmers-bakers to study whether and how bakers and farmers-bakers  
81 contribute to the preservation of socio-cultural and fungal species diversity in sourdough microbial

82 community. This research emerged from a co-construction by bakers, farmer-bakers and academic  
83 researchers.

## 84 **Materials and methods**

### 85 **A questionnaire survey, face-to-face interviews and focus-groups to collect bread** 86 **making practices**

87 All materials were collected among bakers and farmer-bakers through a questionnaire survey, interviews  
88 and focus groups. The collected variables were related to *i*) the ingredients origin : wheat varieties types  
89 (ancient populations also called landraces / modern varieties), whether they produced flour from their  
90 own wheat, whether they had their own mill or use an external mill, water origin, *ii*) the sourdough  
91 recipe: its age, its hydration state, the origin of the chief sourdough (sample of dough or sourdough), the  
92 number of back-sloppings before bread making and per week, the temperature of water used for back-  
93 sloppings, *iii*) their bread making practices: the number of bread makings per week, the percentage of  
94 sourdough, flour and salt in bread dough, the kneading methods, the total duration of fermentation and  
95 the addition of baker's yeast in dough.

### 96 **Sourdoughs samples, enumeration and strain isolation**

97 Sourdoughs were collected in 39 French bakeries before kneading and referred to as final sourdoughs  
98 (Table S1). On the day of collection, they were sent to the lab where yeast and bacteria were enumerated  
99 and isolated as in [13, 14], and sourdoughs stored at -20°C in sterile vials for non- culture based analysis.  
100 Ethics and rights associated with sourdough collection and strains isolation have been respected.

### 101 **Sourdough acidity and metabolic analyses**

102 For each sourdough, three independent 1-g replicates were analysed. pH and Total Titrable Acidity were  
103 measured as described in (22). Organic acids, alcohol and sugars concentrations (expressed as g/kg of  
104 sourdough) were analysed by liquid chromatography using an HPLC HP 1100 LC system (Agilent  
105 technologies, Santa clara, CA, USA) equipped with a refractive index detector (RID Agilent G1382A)

106 and a UV detector (Agilent G1314A). Two different columns were used, a Rezex ROA-organic acids  
107 column and a Rezex RPM-monosaccharide column (SDVB – Pb+2 8%, 300x7.8mm, Phenomenex,  
108 Torrance, CA, USA). The details of the procedure are described in supplementary information (Method  
109 S1).

## 110 **Yeast species identification**

111 The Internal transcribed spacer 1 (ITS1) ribosomal DNA of each 1216 yeast isolates was amplified by  
112 PCR from chromosomal DNA, either by using primers ITS1F and ITS2 [15, 16], or primers NSA3 and  
113 58A2R [16, 17]. For isolates unidentified with the ITS1 region alone, DNA was extracted according to  
114 MasterPure Yeast DNA purification kit (Epicentre, Epibio). PCR reactions targeting partial genes, the  
115 D1D2 region of the large subunit of rRNA (LSU), a part of the RNA polymerase II large subunit  
116 encoding gene (*RPB1*), a part of the RNA polymerase II encoding gene (*RPB2*), a part of the actin  
117 encoding gene *Act1* and Transcriptional Elongation Factor TEF were performed. To discriminate three  
118 specific isolates, PCR on genes *GHD1*, *FSY1*, *URA3*, *DRC1*, *MET2* were performed [18–21] (Table S4).  
119 All PCR products were sent to be sequenced with Sanger sequencing (Eurofins, Germany). Species were  
120 identified using NCBI [22], YeastIP [23] and a personal database, which was constructed after *ITS1*,  
121 *RPB2*, LSU sequencing of all 33-yeast species reportedly found in sourdoughs in the literature [1].

## 122 **Sourdough DNA extraction, MiSeq sequencing, bioinformatics**

123 The ITS1 region was targeted with the PCR primers ITS1-F (5'- CTTGGTCATTTAGAGGAAGTAA -  
124 3') and ITS2 (5'-GCTGCGTTCTTCATCGATGC-3').

125 The sequencing run was performed with MiSeq Reagent Kit v3. 2015 [13, 24]. Sequences were analysed  
126 through FROGS “Find Rapidly OTU with Galaxy Solution” [28] and home-made pipelines. Overlapped  
127 reads were merged with Flash [29] with a minimum overlap of 10 nucleotides, a maximum overlap of  
128 300 nucleotides and a maximum mismatch density of 0.1. Adapters were removed with Cutadapt [30]  
129 and data were cleaned with Sickle [25] Reads were clustered with Swarm [31] and chimeras deleted  
130 with VSEARCH [32]. Sequences were then filtered on minimum abundance of 0.05% of all sequences.

131 From the OTU's abundance table and for each OTU, the taxonomic affiliation using UNITE Version  
132 7.1, Release 2016-11-20 [33], YeastIP [23] and our own databases [13] [24] was obtained by blasting  
133 OTUs representative sequences against each database.

134

## 135 **Data analyses**

136 All statistics and plots (ggplot2 [34], leaflet package [35], with minor esthetical adjustment with  
137 Inkscape) have been done with R.

138 To analyse bread making practices, a multiple correspondence analysis (MCA) and hierarchical  
139 clustering on principal components based on the first two axes of the MCA were performed using the  
140 FactoMineR R package [36].

141 To analyse fungal community, weighted Unifrac distances between sourdough communities were  
142 computed from a rooted phylogenetic tree based on the OTUs sequences using the R-packages Phyloseq  
143 and GUniFrac [26, 27, 38]. Phylogenetic sequences were aligned with Clustalo [37] and phylogenetic  
144 tree were built with the parsimony algorithm, with 100 replicates bootstraps, pairwise ktuple-distances  
145 with Seaview [37]. Different roots were tested (*Sporidiobolales sp.*, *Bullera globospora*, *Trichosporon*  
146 *asahii*, *Udeniomyces pyricola*). Tree architecture did not change with the root. It did not fit the expected  
147 phylogeny and, notably, some *Ascomycota* were misclassified among the *Basidiomycota*. However, the  
148 dominant sourdough species belonging to the *Saccharomycetaceae* family were clustered according to  
149 expected clades or subclades, except that *Kazachstania servazzi* and *Kazachstania unispora* were  
150 grouped in a clade closer to *Saccharomyces* species than to other *Kazachstania* species. Using the  
151 Unifrac distances matrix, we performed a Principal Coordinate Analysis (PCoA) and clustered  
152 sourdough communities using the first two axes of the PCoA. To check the sensitivity of our analysis  
153 to this misclassification, we performed the same analyses without the sourdoughs that had one  
154 misclassified species representing more than 10% of their reads, *i.e.* sourdoughs B20, B41, B42, and  
155 B44 and found the same clustering [27].

156 For each sourdough, the species richness, Chao1, Shannon and Simpson indexes were computed, and  
157 the Shannon and Simpson indices values were converted to the effective number of species per  
158 sourdough. This number was estimated from the Shannon diversity index as  $e^{\overline{H}}$  and from  
159 the Simpson diversity index as  $\frac{1}{1-Simpson\ index}$  [39, 40]. For probability estimates, the exact 95%  
160 confidence intervals were computed using a binomial distribution.

161 To study the link between microbial diversity and bakery practices, a univariate Permutational  
162 Multivariate Analysis (PERMANOVA) on the Unifrac distance matrix was performed for each bakery  
163 practice variable. We performed univariate analysis on the 30 bakers who had less than 8 missing values  
164 among the 29 bread making practices variables and adjusted the p-value using FDR correction to account  
165 for multiple testing. In addition, independence exact Fisher tests between the variable providing fungal  
166 community PCoA groups and each of the bread making practices variables were performed. Multiple  
167 testing was accounted for using the False Discovery Rate method [41].

168 The link between the baker practices group, the fungal community group or the yeast dominant species  
169 and the variation of each quantitative variable (microbial density, pH, TTA, metabolite concentration)  
170 was tested with the following mixed effect model:  $Y_{ijk} = \mu + \alpha_i + B_j + \varepsilon_{ijk}$  with  $\varepsilon_{ijk} \sim N(0, \sigma^2)$ , where  
171  $\alpha_i$  is the effect of the fungal community group  $i$  modelled as a fixed effect and  $B_j$  is the effect of  
172 sourdough  $j$  modelled as a random effect and  $k$  represents the measurement replicates. For sourdough  
173 hydration rate, the variable was arcsin transformed but sourdough effect was not included in the model  
174 because no repetition was obtained from any sourdough. The model parameters were estimated using  
175 the lmerTest R package [42]. To test the fixed effects, we used likelihood ratio tests. Multiple  
176 comparisons of means were performed using Tukey tests with the multcomp package [43]. p-values  
177 were all adjusted for multiple testing with the FDR method. The geographical structuration was tested  
178 with a Mantel test on the Unifrac distances matrix and the geographical distances matrix computed with  
179 the package geosphere [44] and ade4 [45].

180 Data and scripts are shared on Zenodo. <http://doi.org/10.5281/zenodo.2600170>

181

## 182 **Results and discussion**

### 183 **Bread making processes and the diversity of bread making practices**

184 We worked with thirty-nine French bakers producing natural sourdough bread and distributed all over  
185 France (Table S1). Their bread making practices were analysed through personal interviews (n=12),  
186 focus groups (n=3), observation during bread-making workshops (n=2), and an online/phone survey  
187 (n=36). The general process of sourdough bread making is presented in Figure 1. We analysed 29  
188 variables around this general bread making process, describing variations of the practices at all steps of  
189 the bread making process, from wheat grains to baked bread (Figure S1). Three bakers who did not  
190 answer the survey on bread making practices, and four others who did not provide enough information  
191 about their practices were excluded from the analysis. According to a hierarchical clustering on principal  
192 components (HCPC), the 32 other bakers clustered into two groups corresponding to two main types of  
193 bread making practices (Figure 2). The first group, hereafter termed “farmer” practices group, includes  
194 6 bakers and 11 farmers-bakers using the following practices: low bread production (<500 kg per week,  
195 81% of the bakers of the “farmer” group), use of ancient wheat populations (56%), manual kneading  
196 (63%), working at ambient temperature (88%), long fermentation periods (more than 4 hours for 88%),  
197 and no use of commercial baker’s yeast (88%). In addition, they tend to make their chief sourdough  
198 from dough after kneading (75%). The second group, hereafter called “artisanal” practices group  
199 consists of 12 bakers and 4 farmer-bakers having more intensive practices, characterized by a large bread  
200 production (>500 kg per week, 81%), mechanical kneading (100%), use of modern wheat varieties  
201 (63%), working at ambient temperature (56%), using commercial yeast starters in addition to sourdough  
202 for bread making or using commercial yeast starters for pastries and buns making (81%). In this second  
203 group, bakers tend to make their chief sourdough from a final sourdough.



## 204 **Fungal community composition**

205 Sourdough is a mix of flour and water naturally fermented by bacteria and yeasts. Sourdough yeast  
206 density ranged from  $8.1 \cdot 10^4$  to  $5.8 \cdot 10^8$  CFU per gram of sourdough, with a mean value of  $2.9 \cdot 10^7$  CFU  
207 per gram, as commonly found in sourdoughs from all over the world [1, 17, 46, 47]. We isolated 20 to  
208 40 yeast strains from each sourdough and identified species using ITS sequence as well as other barcodes  
209 when needed (see M&M section). A total of 1216 strains were characterized from 38 sourdoughs. In  
210 addition, we developed an ITS1 meta-barcoding MiSeq sequencing method on sourdough (see sup  
211 M&M). After filtering 5,360,620 raw ITS1 sequences for quality, abundance (0.005%) and chimera,  
212 3,542,801 sequences were further analyzed. Overall, the sequences clustered in 113 OTUs. The number  
213 of reads per sourdough ranged from 8421 to 194 557. Therefore, we carried out our analysis on the  
214 rarefied matrix. Among all OTUs, 64 were identified as non-yeast, including 10 assigned to the order  
215 *Triticodae* (especially to the species *T. aestivum*), 50 assigned to plant pathogen fungi, such as  
216 *Alternaria*, *Aspergillus* or *Fusarium*, *Gibberella*, while 4 OTUs remained unidentified. Among the 40  
217 yeast or yeast-like OTUs, 96% of total reads were assigned to the phylum *Ascomycota*, 87.5% to the  
218 order *Saccharomycetales* and 85.7% to the family *Saccharomycetaceae*. Only 4% of the total reads were  
219 assigned to the phylum *Basidiomycota*. Overall, three OTUs assigned to the species *Kazachstania*  
220 *humilis*, *Kazachstania bulderi* and *Saccharomyces cerevisiae* represented 20.3%, 15.5% and 24.1%  
221 respectively of the total number of reads and 28.1%, 23.7% and 18.2% respectively of the number of  
222 reads identified as yeast species (Figure 3).

223 Both non culture-based and culture-based methods allowed the identification of the same dominant  
224 species (defined as a species with an over 50% frequency) for all sourdoughs but five (B09, B20, B22,  
225 B25, B41) (Figure 3). In two cases, the discrepancy was explained by the detection of *Cladosporium* sp.  
226 at high frequency with metabarcoding while this species could not be isolated in the laboratory (Figure  
227 3). In two other cases, it was explained by a high number of *S. cerevisiae* isolated in the laboratory  
228 compared to what was observed using metabarcoding sequencing. Finally, in the last case, the  
229 identification of *Pichia kudriavzevii* required additional sequencing as it shares an identical ITS with  
230 *Candida xylopsoci*. Because metabarcoding allows a deeper characterization of the fungal species

231 diversity with few discrepancy cases, the distribution of fungal species diversity will be further described  
232 using metabarcoding data only. Previous analysis of the same sourdoughs revealed that *L.*  
233 *sanfranciscensis* was the dominant bacterial species in all analysed sourdoughs but two, where the  
234 dominant species was either *L. curvatus* or *L. heilongjiangensis* [13, 14]. Therefore, we decided to study  
235 the distribution pattern of microbial species in the fungal community only.

## 236 **Distribution of fungal species diversity over sourdoughs**

237 All sourdoughs but two had a dominant yeast species with a relative abundance over 50% and  
238 many species with a lower relative abundance (Figure 3). Within sourdoughs, fungal species richness  
239 ranged from 10 to 33, with a 23.5 median (Table S2). The effective number of species per sourdough  
240 calculated from the Shannon diversity index ranged from 1 to 6.8 (Table S2), with 70% of sourdoughs  
241 having an index below 2 (Table S2). Between-sourdoughs species diversity was analysed using weighted  
242 Unifrac distances, computed from a phylogenetic tree built from the distances between OTUs using  
243 *Sporidiobolales* species as root (Figure S2). Unifrac distances computed with four differently rooted  
244 trees were highly positively correlated (Figure S2). Unifrac distances between sourdoughs ranged from  
245 0.0005 and 0.71, with a median of 0.49 and a mean of 0.52. There was no significant correlation between  
246 the Unifrac distances and geographical distances between sourdoughs (Mantel test,  $P=0.35$ ) (Figure 4).

247 We then analysed specifically the distribution of yeast species diversity as yeast species,  
248 together with lactic acid bacteria, are the main functional player in a sourdough ecosystem and for bread  
249 quality. Over the 40 yeast species detected in the 38 sourdoughs, 12 had a relative abundance over 50%  
250 in at least one sourdough, four had a relative abundance between 20% and 50% and 24 had a relative  
251 abundance below 10%. All dominant species (relative abundance over 50%) were fermentative yeast  
252 species, except in one sourdough that had a *Cladosporium* species. We found all the sourdough yeast  
253 genera (*Saccharomyces*, *Candida*, *Kazachstania*, *Pichia*, *Torulaspora* and *Hyphopichia*) commonly  
254 reported in the literature except the *Wickerhamomyces* genus that we did not detect in our samples [47–  
255 49].

256 **The baker's yeast, *Saccharomyces cerevisiae* is not the most widespread yeast species in**  
257 **sourdoughs**

258 The well-known baker's yeast, *Saccharomyces cerevisiae*, was found in 53% of all sourdoughs (95%  
259 confidence intervals=36% - 69%) but was dominant (relative abundance over 50%) in only 24% (95%  
260 confidence intervals=11% - 40%) (Figure 3). In two cases, *S. cerevisiae* co-occurred with another yeast  
261 species at similar relative abundance. In the first case, *S. cerevisiae* was present at a relative abundance  
262 of 40% with *Candida sake* at a 41% relative abundance. In the second case, it was found at a relative  
263 abundance of 47% with *Pichia kudriavzevii* at a relative abundance of 52%. In all the other cases, *S.*  
264 *cerevisiae* had a relative abundance below 21% and was found with other dominant yeast species, such  
265 as *Kazachstania australis*, *Kazachstania humilis*, *Saccharomyces uvarum* or *Torulaspora delbrueckii*.  
266 This suggests that *S. cerevisiae* did not displace other species and can indeed be out-competed by other  
267 species in sourdoughs. Therefore, despite the recurrent use of *S. cerevisiae* as starter, its massive use in  
268 some bakeries and homes, and its occurrence in a wide range of habitats such as soil, trees, and humans  
269 [2, 3], this species does not appear to have overwhelmingly colonized French traditional sourdoughs  
270 (Figure 3).

271 **The *Kazachstania* genus is highly represented in sourdoughs**

272 *Kazachstania* was the most represented yeast genus over all sourdoughs, when considering both the  
273 number of reads over all sourdoughs and the number of detected species. Indeed, this genus represented  
274 57% of the total number of reads while *Saccharomyces* represented 26% of the total number of reads.  
275 In addition, eight species of the *Kazachstania* genus were found in sourdough, a much higher figure  
276 than for the *Saccharomyces* genus, represented by only two species (*S. uvarum* and *S. cerevisiae*) (Figure  
277 3). *Kazachstania* species dominated in 54% (95% confidence intervals=36%-69%) of sourdoughs while  
278 *Saccharomyces* species dominated in 27% only (95% confidence intervals=13%-43%). *K. humilis*,  
279 followed by *K. bulderi* were the most commonly dominant *Kazachstania* species, and found in  
280 respectively 21% (95% confidence intervals=10%-37%) and 15% of sourdoughs (95% confidence  
281 intervals=6%-31%) (Figure 3). *K. humilis* is common in sourdoughs and has been found in many

282 countries, viz. China, Ethiopia, Finland, Germany, Morocco, USA, Italy, Belgium and France [49–52].  
283 *K. bulderi* has been reported for the first time in anaerobic maize silage in the Netherlands and in  
284 fermented liquid feed for piglets [53, 54] and more recently in French wheat sourdoughs [14, 17]. A yet  
285 undescribed *Kazachstania* species was also identified in five sourdoughs (4.5%-29%) and found  
286 dominant in three (1.7%-22%). Strains of this species were closely related to a strain previously isolated  
287 from boza, a Bulgarian fermented drink, as estimated with ITS and LSU (D1D2) barcodes (Source:  
288 NCBI, GenBank: KC118125.1 and KX369579.1). In addition, *Kazachstania saulgeensis*, a recently  
289 described species [55, 56], was dominant in one sourdough (0.07%-14%). Finally, several *Kazachstania*  
290 species were detected for the first time as dominant in sourdoughs, whereas they had been previously  
291 found in other environments, like soil (*K. australis*), sauerkraut (*K. barnettii*), fermented milk (*K.*  
292 *unispora*), or feces (*K. unispora*) [55, 57, 58]. None of the previous studies on sourdough have  
293 evidenced as many *Kazachstania* species [1].

#### 294 **The diversity of sourdough fungal communities was associated with differences in bread making** 295 **practices**

296 We tested whether sourdough fungal community composition could be explained by bread making  
297 practices. To do so, we performed univariate PERMANOVA analysis on the 30 bakers with less than 8  
298 missing values for the 29 bread making practices variables (Table S3). The univariate analysis revealed  
299 that the weighted Unifrac distance between sourdoughs varied significantly ( $P < 0.05$ ) with the use of  
300 commercial yeast in bakery. It also varied significantly with sourdough age, chief sourdough origin  
301 (dough, sourdough or both), the quantity of bread produced per week, the milling method (cylinder,  
302 millstone, Astrie, Tyrol), the type of wheat variety (ancient, modern or a mix thereof) and the  
303 fermentation duration. However, after FDR correction for taking into account multiple testing, none of  
304 these variables significantly explained Unifrac distances.

305 In order to understand further the relationship between sourdough fungal community composition  
306 and bread making practices, we clustered sourdoughs according to their fungal community composition,  
307 on the basis of the PCoA of their weighted Unifrac distances. Then, we tested the link between the

308 fungal community group and the bread making practice group (farmers/artisanal practices group) as well  
309 as the link between the fungal community group and each of the different bread making practices (Figure  
310 5). Sourdoughs were clustered into three fungal community groups. Group 1 clustered all sourdoughs  
311 (but two) having *Kazachstania* species as dominant species (*K. humilis*, *K. barnettii*, *K. bulderi*, *K.*  
312 *saulgeensis*, *K. sp.*). Group 2 contained sourdoughs with *Saccharomyces sp.*, *K. servazzi* or *K. unisporea*  
313 as dominant species. Group 3 sourdoughs harbored *S. cerevisiae* together with other species such as  
314 *Pichia kudriavzevii*, *Candida sake*, or a Dipodascaceae sp. Group 1 sourdoughs were mostly made by  
315 bakers having farmer's bread making practices while group 2 and 3 sourdoughs were mostly made by  
316 bakers using artisanal practices (exact Fisher test,  $P=0.035$ ). The fungal community groups were  
317 significantly related to two specific bread making practice variables: the quantity (in kg) of bread made  
318 per week (Exact Fisher test,  $P=0.001$ ) and the use of commercial yeast (Exact Fisher test,  $P=0.05$ ). All  
319 sourdoughs in group 2 but one were found in bakeries making between 500 kg and 1000 kg of bread per  
320 week, while groups 1 and 3 sourdoughs originated from bakeries producing very different amounts of  
321 bread (ranging from amounts below 250 kg to over 1000 kg). In addition, group 1 sourdoughs were  
322 more frequently found in bakeries that do not use commercial yeast while group 2 and 3 were more  
323 frequently found in bakeries using the commercial yeast *S. cerevisiae* (Exact Fisher test,  $P=0.01$ ).  
324 Interestingly, group 1 sourdoughs harbored *S. cerevisiae* either at a relative abundance below 1% or not  
325 at all, while all groups 2 and 3 sourdoughs had *S. cerevisiae* at a relative abundance over 20%, except  
326 in three cases where it was either absent or at a relative abundance below 6%.

327 To test more specifically the link between bread making practices and the distribution of  
328 *Kazachstania* species, we analyzed more in depth group 1 sourdoughs. Within this group, 8 sourdoughs  
329 had *K. humilis* as dominant species, 6 had *K. bulderi*, 3 had the undescribed *Kazachstania* species and  
330 the remainder had still other *Kazachstania* species. All sourdoughs made with artisanal practices carried  
331 *K. humilis* as dominant species or, in one case, the yet undescribed *Kazachstania sp.* By contrast,  
332 sourdoughs made with farmers' practices had as dominant species *Kazachstania bulderi*, *K. australis*,  
333 *K. barnettii*, *K. saulgeensis* or the yet undescribed *Kazachstania* species (exact Fisher test,  $P=0.004$ ).

334 Other bread making practices than the ones studied here could also explain the distribution of yeast  
335 species diversity. Interviews with the 5 bakers working with sourdough hosting *Kazachstania bulderi*  
336 and the underscribed *Kazachstania* species suggested the role of dispersion of these species in French  
337 sourdoughs. Indeed, these bakers have been connected over the years either through seed exchanges,  
338 sourdoughs mixing or gifts, bread making training in common or working in one another's bakery.  
339 Although sourdough bacteria have been shown to originate from the bakery house microbiota and flour  
340 [59, 60], the origins of yeast species found in sourdough are yet unknown.

341

342 **Fungal community composition was partly related to sourdough acidity, maltose**  
343 **concentration and hydration**

344 The composition of fungal community may affect sourdough metabolic content (sugars, acids, alcohols)  
345 via fungal strains metabolite consumption and production. Inversely, the presence and concentration of  
346 different compounds (sugars, acids, alcohols) may also be one of the driver of fungal communities'  
347 composition as those parameters may affect differently the different fungal strains fitness. For example,  
348 lactic acid bacteria (LAB) are the main producers of acidity in sourdough, but yeasts also produce acetic  
349 acid and may also indirectly affect acidity through positive or negative interaction with bacteria.

350 To investigate the relation between sourdough fungal communities and metabolic compounds, we  
351 quantified sourdough hydration, yeast density, bacteria density, sourdough pH, Total Titrable Acidity  
352 (TTA), sourdough concentration in seven sugars (maltose, glucose, fructose, raffinose, arabinose,  
353 mannose, xylose), four alcohols (glycerol, ethanol, mannitol, meso-erythritol), six acids (lactate,  
354 acetate, glutarate, pyruvate, malate, succinate) and calculated the fermentative quotient (lactate over  
355 acetate ratio). For each variable, there was a wide range of variation (Table S5). The principal component  
356 analysis based on all variables showed no evidence of sourdoughs grouping (Fig S4). As expected in  
357 fermentation, yeast density was positively correlated to ethanol ( $r=0.74$ ,  $P<0.001$ ), glycerol ( $r=0.67$ ,  
358  $P<0.001$ ), and acetate ( $r=0.6$ ,  $P<0.001$ ) concentration. However, it was not significantly correlated to

359 sugar concentrations. This might be explained by sugar competition and cross feeding that may exist  
360 between yeasts and bacteria.

361 We then tested whether bread making practices group (farmers' practices and artisanal practices)  
362 was associated with the variation of each quantitative variable separately. There was no significant effect  
363 of the bread making practice group except for sourdough hydration that was significantly higher in  
364 sourdoughs made using farmers' practices ( $F_{1,94}=11.69$ ,  $P<0.001$ ). Sourdoughs made with farmer's  
365 practices had in average 55% water while sourdoughs made with artisanal practices had in average 49%  
366 of water.

367 In addition, we tested whether differences in fungal community were associated with any variation  
368 in a quantitative variable (Table S5). Group 3 microbial community sourdoughs (defined by PCoA  
369 clustering on Unifrac distance, see below), which contain *S. cerevisiae* in co-dominance with a second  
370 yeast species (*Candida sake*, *Pichia kudriavzevii* or a *Dipodascus* species), had a significantly higher  
371 mean pH (mean  $pH_{\text{group3}}=4.2$  against  $pH_{\text{group1}}=3.8$ , Tukey Contrasts,  $P<0.001$ ), lower TTA (mean TTA  
372  $_{\text{group3}}=7.7$  against  $TTA_{\text{group1}}=17.1$ , Tukey Contrasts,  $P=0.002$ ), and a higher maltose concentration (mean  
373  $Maltose_{\text{group3}}=52.8$  mg/gr of sourdough against  $Maltose_{\text{group1}}=24.1$  mg/gr of sourdough, Tukey Contrasts  
374  $P=0.002$ ) than group1, having a *Kazachstania* dominant species. Compared to group 2 having in most  
375 cases *S. cerevisiae* as dominant species, it also had higher pH ( $pH_{\text{group2}}=3.9$ , Tukey Contrasts,  $P=0.003$ ),  
376 and higher maltose concentration ( $Maltose_{\text{group2}}=23.7$ , Tukey contrast,  $P=0.003$ ). These data may reflect  
377 a lower fermentative activity for group 3 fungal community having two co-dominant species, and/or a  
378 negative interaction effect of group3 fungal community on the activity of lactic acid bacteria (LAB),  
379 which are the main producers of sourdough acids. Previous studies on the bacteria content of the same  
380 sourdoughs showed that *L. sanfranciscensis* was most generally the dominant species, although *L.*  
381 *heilongjiangensis*, *L. curvatus* or *L. brevis* were also found as dominant species [13, 14]. We found no  
382 significant correlation between LAB and yeast densities ( $r=-0.15$ ,  $p=0.45$ , Fig S4) but the link between  
383 fungal and bacteria community might be species and strains dependent. Additional studies on the  
384 interactions between fungal and bacterial communities need to be performed to better understand how  
385 they may drive sourdough acidity and sugar content.

386 Finally, we analysed whether the difference in dominant yeast species was associated with some  
387 variation of any of the studied quantitative variables. We only considered the 26 sourdoughs having  
388 either *S. cerevisiae* (9 sourdoughs), *K. humilis* (8 sourdoughs), *K. bulderi* (6 sourdoughs) or *K. sp* (3  
389 sourdoughs) as dominant species, since the other yeast species were found dominant only once. The  
390 differences in dominant species was not significantly associated to variation in sourdough sugar, acids  
391 or alcohol concentration. However, *K. bulderi* was found in significantly more hydrated sourdoughs  
392 (63% water content in average) compared to the three other dominant species, *K. humilis*, *K. sp.*, and *S.*  
393 *cerevisiae*, found in sourdoughs having respectively 49%, 47%, 53 % water content in average (Tukey  
394 Contrasts,  $P < 0.001$ ;  $P < 0.001$ ;  $P < 0.001$ ). *K. bulderi* was found to be dominant only in sourdoughs made  
395 using farmers' practices, a bread making practice group that was also found to be associated with more  
396 hydrated sourdoughs. Additional experiments should be carried out to test whether this species has  
397 indeed a better fitness in more hydrated sourdoughs or whether its presence in more hydrated sourdoughs  
398 is related to covariation with other farmer practices.

## 399 **Conclusion and perspectives**

400 In conclusion, a great diversity of bread making practices and fungal community composition  
401 was found in our sample of French sourdoughs. Surprisingly, the well-known baker's yeast  
402 *Saccharomyces cerevisiae* was found dominant only in one fourth of the sampled sourdoughs. By  
403 contrast, several species of the neighbouring genus *Kazachstania* (including one yet undescribed  
404 species) were detected at high frequency, revealing a major role for this mostly unknown genus in the  
405 study of fungal domestication and in bread making. The fungal community diversity was partly  
406 explained by the diversity in bread making practices. It was also partly associated with sourdough acidity  
407 and maltose concentration, suggesting the role of fungi/bacteria interaction in sourdough functional  
408 diversity. To our knowledge, this is the first evidence of the influence of artisanal practices on taxonomic  
409 and functional diversity in microbial communities. Therefore, our results highlight the necessity of  
410 maintaining socio-cultural diversity to maintain microbial diversity in food systems. These findings



411 could not have been evidenced without the collaboration of bakers and scientists, showing the  
412 importance of participatory research projects to gain new insight into biodiversity preservation.

### 413 **Acknowledgements**

414 This work has emanated from research conducted with the financial support of the French National  
415 Research Agency, ANR-13-ALID-0005 and INRA. We thank all the bakers and farmers-bakers for  
416 constructing the project with us and for sharing their sourdoughs and knowledge. We thank Yoann  
417 Robert, Candice Aulard, Josette Bessièrre for lab assistance and Matthieu Barret for MiSeq sequencing.  
418 We also would like to thank Philippe Roussel for sharing his knowledge about French bread.

### 419 **References**

- 420 1. Carbonetto B, Ramsayer J, Nidelet T, Legrand J, Sicard D. Bakery yeasts, a new model for  
421 studies in ecology and evolution. *Yeast* 2018.
- 422 2. Peter J, De Chiara M, Friedrich A, Yue J-X, Pflieger D, Bergström A, et al. Genome evolution  
423 across 1,011 *Saccharomyces cerevisiae* isolates. *Nature* 2018; **556**: 339.
- 424 3. Legras J-L, Galeote V, Bigey F, Camarasa C, Marsit S, Nidelet T, et al. Adaptation of *S.*  
425 *cerevisiae* to fermented food environments reveals remarkable genome plasticity and the  
426 footprints of domestication. *Molecular biology and evolution* 2018; **35**: 1712–1727.
- 427 4. Ropars J, López-Villavicencio M, Snirc A, Lacoste S, Giraud T. Blue cheese-making has shaped  
428 the population genetic structure of the mould *Penicillium roqueforti*. *PloS one* 2017; **12**:  
429 e0171387.
- 430 5. Independent domestication events in the blue-cheese fungus *Penicillium roqueforti* | bioRxiv.  
431 <https://www.biorxiv.org/content/10.1101/451773v1.abstract>. Accessed 21 Mar 2019.
- 432 6. Arranz-Otaegui A, Carretero LG, Ramsey MN, Fuller DQ, Richter T. Archaeobotanical evidence  
433 reveals the origins of bread 14,400 years ago in northeastern Jordan. *Proceedings of the National*  
434 *Academy of Sciences* 2018; 201801071.
- 435 7. Samuel D. Bread in archaeology. *Civilisations Revue internationale d'anthropologie et de*  
436 *sciences humaines* 2002; 27–36.

- 437 8. Samuel D. Bread in archaeology. *Civilisations Revue internationale d'anthropologie et de*  
438 *sciences humaines* 2002; 27–36.
- 439 9. Gobbetti M, Minervini F, Pontonio E, Di Cagno R, De Angelis M. Drivers for the establishment  
440 and composition of the sourdough lactic acid bacteria biota. *International journal of food*  
441 *microbiology* 2016; **239**: 3–18.
- 442 10. Roussel P, Chiron H, Paillard G. Les pains français: évolution, qualité, production. 2002. Maé-  
443 Erti.
- 444 11. Decock P, Cappelle S. Bread technology and sourdough technology. *Trends in Food Science &*  
445 *Technology* 2005; **16**: 113–120.
- 446 12. Demeulenaere É, Rivière P, Hyacinthe A, Baltassat R, Baltazar S, Gascuel J-S, et al. La sélection  
447 participative à l'épreuve du changement d'échelle. À propos d'une collaboration entre paysans  
448 sélectionneurs et généticiens de terrain. *Natures Sciences Sociétés* 2017; **25**: 336–346.
- 449 13. Michel E, Monfort C, Deffrasnes M, Guezenc S, Lhomme E, Barret M, et al. Characterization  
450 of relative abundance of lactic acid bacteria species in French organic sourdough by cultural,  
451 qPCR and MiSeq high-throughput sequencing methods. *International journal of food*  
452 *microbiology* 2016; **239**: 35–43.
- 453 14. Lhomme E, Orain S, Courcoux P, Onno B, Dousset X. The predominance of *Lactobacillus*  
454 *sanfranciscensis* in French organic sourdoughs and its impact on related bread characteristics.  
455 *International journal of food microbiology* 2015; **213**: 40–48.
- 456 15. White TJ, Bruns T, Lee S, Taylor JW, others. Amplification and direct sequencing of fungal  
457 ribosomal RNA genes for phylogenetics. *PCR protocols: a guide to methods and applications*  
458 1990; **18**: 315–322.
- 459 16. Martin KJ, Rygiewicz PT. Fungal-specific PCR primers developed for analysis of the ITS region  
460 of environmental DNA extracts. *BMC Microbiology* 2005; **5**: 28.
- 461 17. Urien C, Legrand J, Montalent P, Casaregola S, Sicard D. Fungal species diversity in French  
462 bread sourdoughs made of organic wheat flour. *Frontiers in Microbiology* .

- 463 18. Peris D, Sylvester K, Libkind D, Gonçalves P, Sampaio JP, Alexander WG, et al. Population  
464 structure and reticulate evolution of *Saccharomyces eubayanus* and its lager-brewing hybrids.  
465 *Molecular ecology* 2014; **23**: 2031–2045.
- 466 19. Nguyen H-V, Gaillardin C. Evolutionary relationships between the former species  
467 *Saccharomyces uvarum* and the hybrids *Saccharomyces bayanus* and *Saccharomyces*  
468 *pastorianus*; reinstatement of *Saccharomyces uvarum* (Beijerinck) as a distinct species. *FEMS*  
469 *yeast research* 2005; **5**: 471–483.
- 470 20. Libkind D, Hittinger CT, Valério E, Gonçalves C, Dover J, Johnston M, et al. Microbe  
471 domestication and the identification of the wild genetic stock of lager-brewing yeast.  
472 *Proceedings of the National Academy of Sciences* 2011; **108**: 14539–14544.
- 473 21. Sampaio JP, Gonçalves P. Natural populations of *Saccharomyces kudriavzevii* in Portugal are  
474 associated with oak bark and are sympatric with *S. cerevisiae* and *S. paradoxus*. *Applied and*  
475 *environmental microbiology* 2008; **74**: 2144–2152.
- 476 22. The NCBI Handbook, 2nd ed. 2013. National Center for Biotechnology Information (US).
- 477 23. Weiss S, Samson F, Navarro D, Casaregola S. YeastIP: a database for identification and  
478 phylogeny of Saccharomycotina yeasts. *FEMS yeast research* 2013; **13**: 117–125.
- 479 24. Barret M, Briand M, Bonneau S, Prévieux A, Valière S, Bouchez O, et al. Emergence Shapes  
480 the Structure of the Seed Microbiota. *Appl Environ Microbiol* 2015; **81**: 1257–1266.
- 481 25. Core UDB. Sickle: A windowed adaptive trimming tool for FASTQ files using quality. *UC*  
482 *Davis, California, United States of America URL: [http://bioinformatics.ucdavis](http://bioinformatics.ucdavis.edu/software/)*  
483 *edu/software/(Accessed: 7 September 2015)* 2015.
- 484 26. McMurdie PJ, Holmes S. phyloseq: an R package for reproducible interactive analysis and  
485 graphics of microbiome census data. *PloS one* 2013; **8**: e61217.
- 486 27. Chen J. GUniFrac: generalized UniFrac distances. *R package version* 2012; **1**: 2012.
- 487 28. Escudíé F, Auer L, Bernard M, Mariadassou M, Cauquil L, Vidal K, et al. FROGS: find, rapidly,  
488 OTUs with galaxy solution. *Bioinformatics* 2017; **34**: 1287–1294.
- 489 29. Magoč T, Salzberg SL. FLASH: fast length adjustment of short reads to improve genome  
490 assemblies. *Bioinformatics* 2011; **27**: 2957–2963.

- 491 30. Martin M. Cutadapt removes adapter sequences from high-throughput sequencing reads. *EMBNet*  
492 *journal* 2011; **17**: pp–10.
- 493 31. Mahé F, Rognes T, Quince C, de Vargas C, Dunthorn M. Swarm: robust and fast clustering  
494 method for amplicon-based studies. *PeerJ* 2014; **2**: e593.
- 495 32. Rognes T, Flouri T, Nichols B, Quince C, Mahé F. VSEARCH: a versatile open source tool for  
496 metagenomics. *PeerJ* 2016; **4**: e2584.
- 497 33. Kõljalg U, Larsson K-H, Abarenkov K, Nilsson RH, Alexander IJ, Eberhardt U, et al. UNITE: a  
498 database providing web-based methods for the molecular identification of ectomycorrhizal fungi.  
499 *New Phytologist* 2005; **166**: 1063–1068.
- 500 34. Wickham H. ggplot2: elegant graphics for data analysis. 2016. Springer.
- 501 35. Cheng J, Karambelkar B, Xie Y, Wickham H, Russell K, Johnson K. Leaflet: Create Interactive  
502 Web Maps with the JavaScript “Leaflet” Library (2017). URL [https://CRAN.R-project](https://CRAN.R-project.org/package=leaflet)  
503 [org/package= leaflet R package version ; 1](https://CRAN.R-project.org/package=leaflet): 423.
- 504 36. Lê S, Josse J, Husson F. FactoMineR: an R package for multivariate analysis. *Journal of*  
505 *statistical software* 2008; **25**: 1–18.
- 506 37. Gouy M, Guindon S, Gascuel O. SeaView version 4: a multiplatform graphical user interface for  
507 sequence alignment and phylogenetic tree building. *Molecular biology and evolution* 2009; **27**:  
508 221–224.
- 509 38. Lozupone C, Knight R. UniFrac: a new phylogenetic method for comparing microbial  
510 communities. *Applied and environmental microbiology* 2005; **71**: 8228–8235.
- 511 39. Chao Anne, Chiu Chun-Huo, Jost Lou. Phylogenetic diversity measures based on Hill numbers.  
512 *Philosophical Transactions of the Royal Society B: Biological Sciences* 2010; **365**: 3599–3609.
- 513 40. Jost L. Partitioning diversity into independent alpha and beta components. *Ecology* 2007; **88**:  
514 2427–2439.
- 515 41. Benjamini Y, Hochberg Y. Controlling the false discovery rate: a practical and powerful  
516 approach to multiple testing. *Journal of the royal statistical society Series B (Methodological)*  
517 1995; 289–300.

- 518 42. Kuznetsova A, Brockhoff PB, Christensen RHB. lmerTest package: tests in linear mixed effects  
519 models. *Journal of Statistical Software* 2017; **82**.
- 520 43. Hothorn T, Bretz F, Westfall P, Heiberger RM, Schuetzenmeister A, Scheibe S, et al. Package  
521 ‘multcomp’. See <https://cran.r-project.org/web/packages/multcomp/index.html> 2017.
- 522 44. Hijmans RJ, Williams E, Vennes C, Hijmans MRJ. Package ‘geosphere’. 2017.
- 523 45. Dray S, Dufour A-B. The ade4 package: implementing the duality diagram for ecologists.  
524 *Journal of statistical software* 2007; **22**: 1–20.
- 525 46. Clément H, Prost C, Chiron H, Ducasse MB, Della Valle G, Courcoux P, et al. The effect of  
526 organic wheat flour by-products on sourdough performances assessed by a multi-criteria  
527 approach. *Food Research International* 2018; **106**: 974–981.
- 528 47. De Vuyst L, Van Kerrebroeck S, Leroy F. Microbial Ecology and Process Technology of  
529 Sourdough Fermentation. *Advances in Applied Microbiology* 2017.
- 530 48. Siepmann FB, Ripari V, Waszczynskij N, Spier MR. Overview of Sourdough Technology: from  
531 Production to Marketing. *Food and Bioprocess Technology* 2017; 1–29.
- 532 49. Van Kerrebroeck S, Maes D, De Vuyst L. Sourdoughs as a function of their species diversity and  
533 process conditions, a meta-analysis. *Trends in Food Science & Technology* 2017; **68**: 152–159.
- 534 50. Lhomme E, Urien C, Legrand J, Dousset X, Onno B, Sicard D. Sourdough microbial community  
535 dynamics: An analysis during French organic bread-making processes. *Food Microbiology* 2016;  
536 **53, Part A**: 41–50.
- 537 51. Wang X, Du H, Zhang Y, Xu Y. Environmental Microbiota Drives Microbial Succession and  
538 Metabolic Profiles during Chinese Liquor Fermentation. *Applied and environmental*  
539 *microbiology* 2018; **84**: e02369–17.
- 540 52. Valmorri S, Tofalo R, Settanni L, Corsetti A, Suzzi G. Yeast microbiota associated with  
541 spontaneous sourdough fermentations in the production of traditional wheat sourdough breads of  
542 the Abruzzo region (Italy). *Antonie Van Leeuwenhoek* 2010; **97**: 119–129.
- 543 53. Middelhoven WJ, Kurtzman CP, Vaughan-Martini A. *Saccharomyces bulderi* sp. nov., a yeast  
544 that ferments gluconolactone. *Antonie van Leeuwenhoek* 2000; **77**: 223–228.

- 545 54. Gori K, Bjørklund MK, Canibe N, Pedersen AØ, Jespersen L. Occurrence and identification of  
546 yeast species in fermented liquid feed for piglets. *Microbial ecology* 2011; **61**: 146–153.
- 547 55. Jacques N, Sarilar V, Urien C, Lopes MR, Morais CG, Uetanabaro APT, et al. Three novel  
548 ascomycetous yeast species of the Kazachstania clade, *Kazachstania saulgeensis* sp. nov.,  
549 *Kazachstaniaserrabonitensis* sp. nov. and *Kazachstania australis* sp. nov. Reassignment of  
550 *Candida humilis* to *Kazachstania humilis* fa comb. nov. and *Candida pseudohumilis* to  
551 *Kazachstania pseudohumilis* fa comb. nov. *International journal of systematic and evolutionary*  
552 *microbiology* 2016; **66**: 5192–5200.
- 553 56. Sarilar V, Sterck L, Matsumoto S, Jacques N, Neuvéglise C, Tinsley CR, et al. Genome  
554 sequence of the type strain CLIB 1764T (= CBS 14374T) of the yeast species *Kazachstania*  
555 *saulgeensis* isolated from French organic sourdough. *Genomics Data* 2017; **13**: 41–43.
- 556 57. Kurtzman CP. Phylogenetic circumscription of *Saccharomyces*, *Kluyveromyces* and other  
557 members of the *Saccharomycetaceae*, and the proposal of the new genera *Lachancea*,  
558 *Nakaseomyces*, *Naumovia*, *Vanderwaltozyma* and *Zygorulaspora*. *FEMS yeast research* 2003;  
559 **4**: 233–245.
- 560 58. Boynton PJ, Greig D. The ecology and evolution of non-domesticated *Saccharomyces* species.  
561 *Yeast* 2014; **31**: 449–462.
- 562 59. Minervini F, Lattanzi A, De Angelis M, Celano G, Gobbetti M. House microbiotas as sources of  
563 lactic acid bacteria and yeasts in traditional Italian sourdoughs. *Food Microbiology* 2015; **52**:  
564 66–76.
- 565 60. Minervini F, Lattanzi A, Dinardo FR, De Angelis M, Gobbetti M. Wheat endophytic lactobacilli  
566 drive the microbial and biochemical features of sourdoughs. *Food microbiology* 2018; **70**: 162–  
567 171.
- 568

569 **Figure Legends**

570 **Figure 1.** The sourdough bread making process. Sourdough is a mix of flour and water naturally  
571 fermented by bacteria and yeasts. It is initiated by mixing flour, water and occasionally other ingredients.  
572 It is then fed by regularly adding flour and water, a process termed back-slopping. Once considered  
573 mature by bakers based on their acidity, flavour and bubbling activity, the sourdough is called "chief",  
574 or "mother" sourdough, and can then be used for bread making. The bread making process starts from  
575 this "chief sourdough", or from a piece of dough or sourdough sampled from the preceding bread making  
576 process, or initiated from a mix of flour and water naturally colonized by yeasts and LAB following  
577 several back-sloppings. The chief sourdough is refreshed to constitute the final sourdough, which is used  
578 for bread making. This final sourdough is mixed with flour, water, and other ingredients (salt, seeds,  
579 yeasts starters, etc.) during kneading to constitute the dough. After kneading, primary fermentation  
580 occurs during the first rising. The dough is then divided and shaped. The pieces of dough are then left  
581 to rise during a second fermentation and finally oven-baked.

582

583 **Figure 2.** Multiple Correspondence Analysis (MCA) based on 28 categorical variables describing  
584 bread making practices.

585 A) Representation of bakers. Each point represents a bakery. The left area brings together baker with  
586 "artisanal" practices and the right area bakers with "farmer" practices. Centroid of each group is  
587 designed by a triangle. The dot's colors indicate the PCoA cluster of the sourdough fungal community.  
588 Black dots for group 1, white for group 2, grey for group 3. The fungal community of the sourdough of  
589 baker 14 (in red) was not studied. B) Representation of the 20 first categories that mostly contributed  
590 the MCA axis. The category is written next to the triangle. C) Percentage of different categories in each  
591 bread making practices group. Only variables that mostly explained differences between bread making  
592 practice groups are shown: use of commercial yeast, kneading method, chief origin, kg of bread  
593 production per week, number of bread making per week, percent of water in dough, number of back-  
594 sloppings before making bread, water origin, sourdough age and flour percentage in dough

595 **Figure 3.** Yeast species diversity was analyzed for 38 out of the 39 sourdoughs with both cultural and  
596 metabarcoding methods. Sourdough B14 was excluded from microbial analyses, because of difficulties  
597 in isolating strains from the sample, suggesting that this sourdough's microflora was no longer active.  
598 Left: species were identified by traditional microbial isolation and identification using ITS sequencing.  
599 Right: species were identified using ITS1 metabarcoding.

600

601 **Figure 4.** Distribution of yeast species diversity across French sourdough.

602 Each bar represents the yeast species diversity of one sourdough and is placed on the map where the  
603 baker is located.

604

605 **Figure 5.** Representation of fungal community weighted Unifrac distances between sourdoughs.

606 The first line shows the clustering of sourdough according to their Unifrac distance on a tree (left) or on  
607 a PCoA (right). Sourdough fungal community can be clustered in three groups according to their  
608 weighted Unifrac distances. The lines below show the distribution of bread making practices or the  
609 distribution of the dominant or most frequent species among fungal community. Each line corresponds  
610 to a variable. On the left: a tree constructed from the Unifrac distance matrix colored by groups of  
611 sourdough defined by the clustering analysis. In the center: sourdoughs represented on the first 2 axes  
612 of the PCoA colored according to the group of sourdough. On the right: the distribution of modalities of  
613 the variable for each group of sourdough (number of each group on the x-axis).

614



Chief sourdough

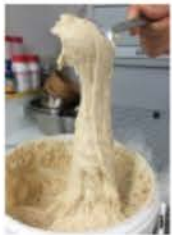

Back-sloppings  
+ Water, Flour

Final sourdough

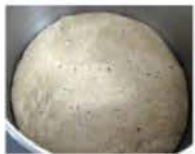

+ Water, Flour, Salt

Kneading

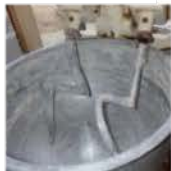

First Rising  
(Fermentation)

Shaping

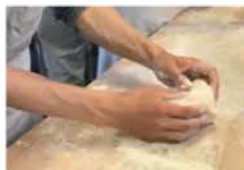

Final Rising (Fermentation)

Baking

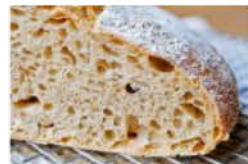

A)

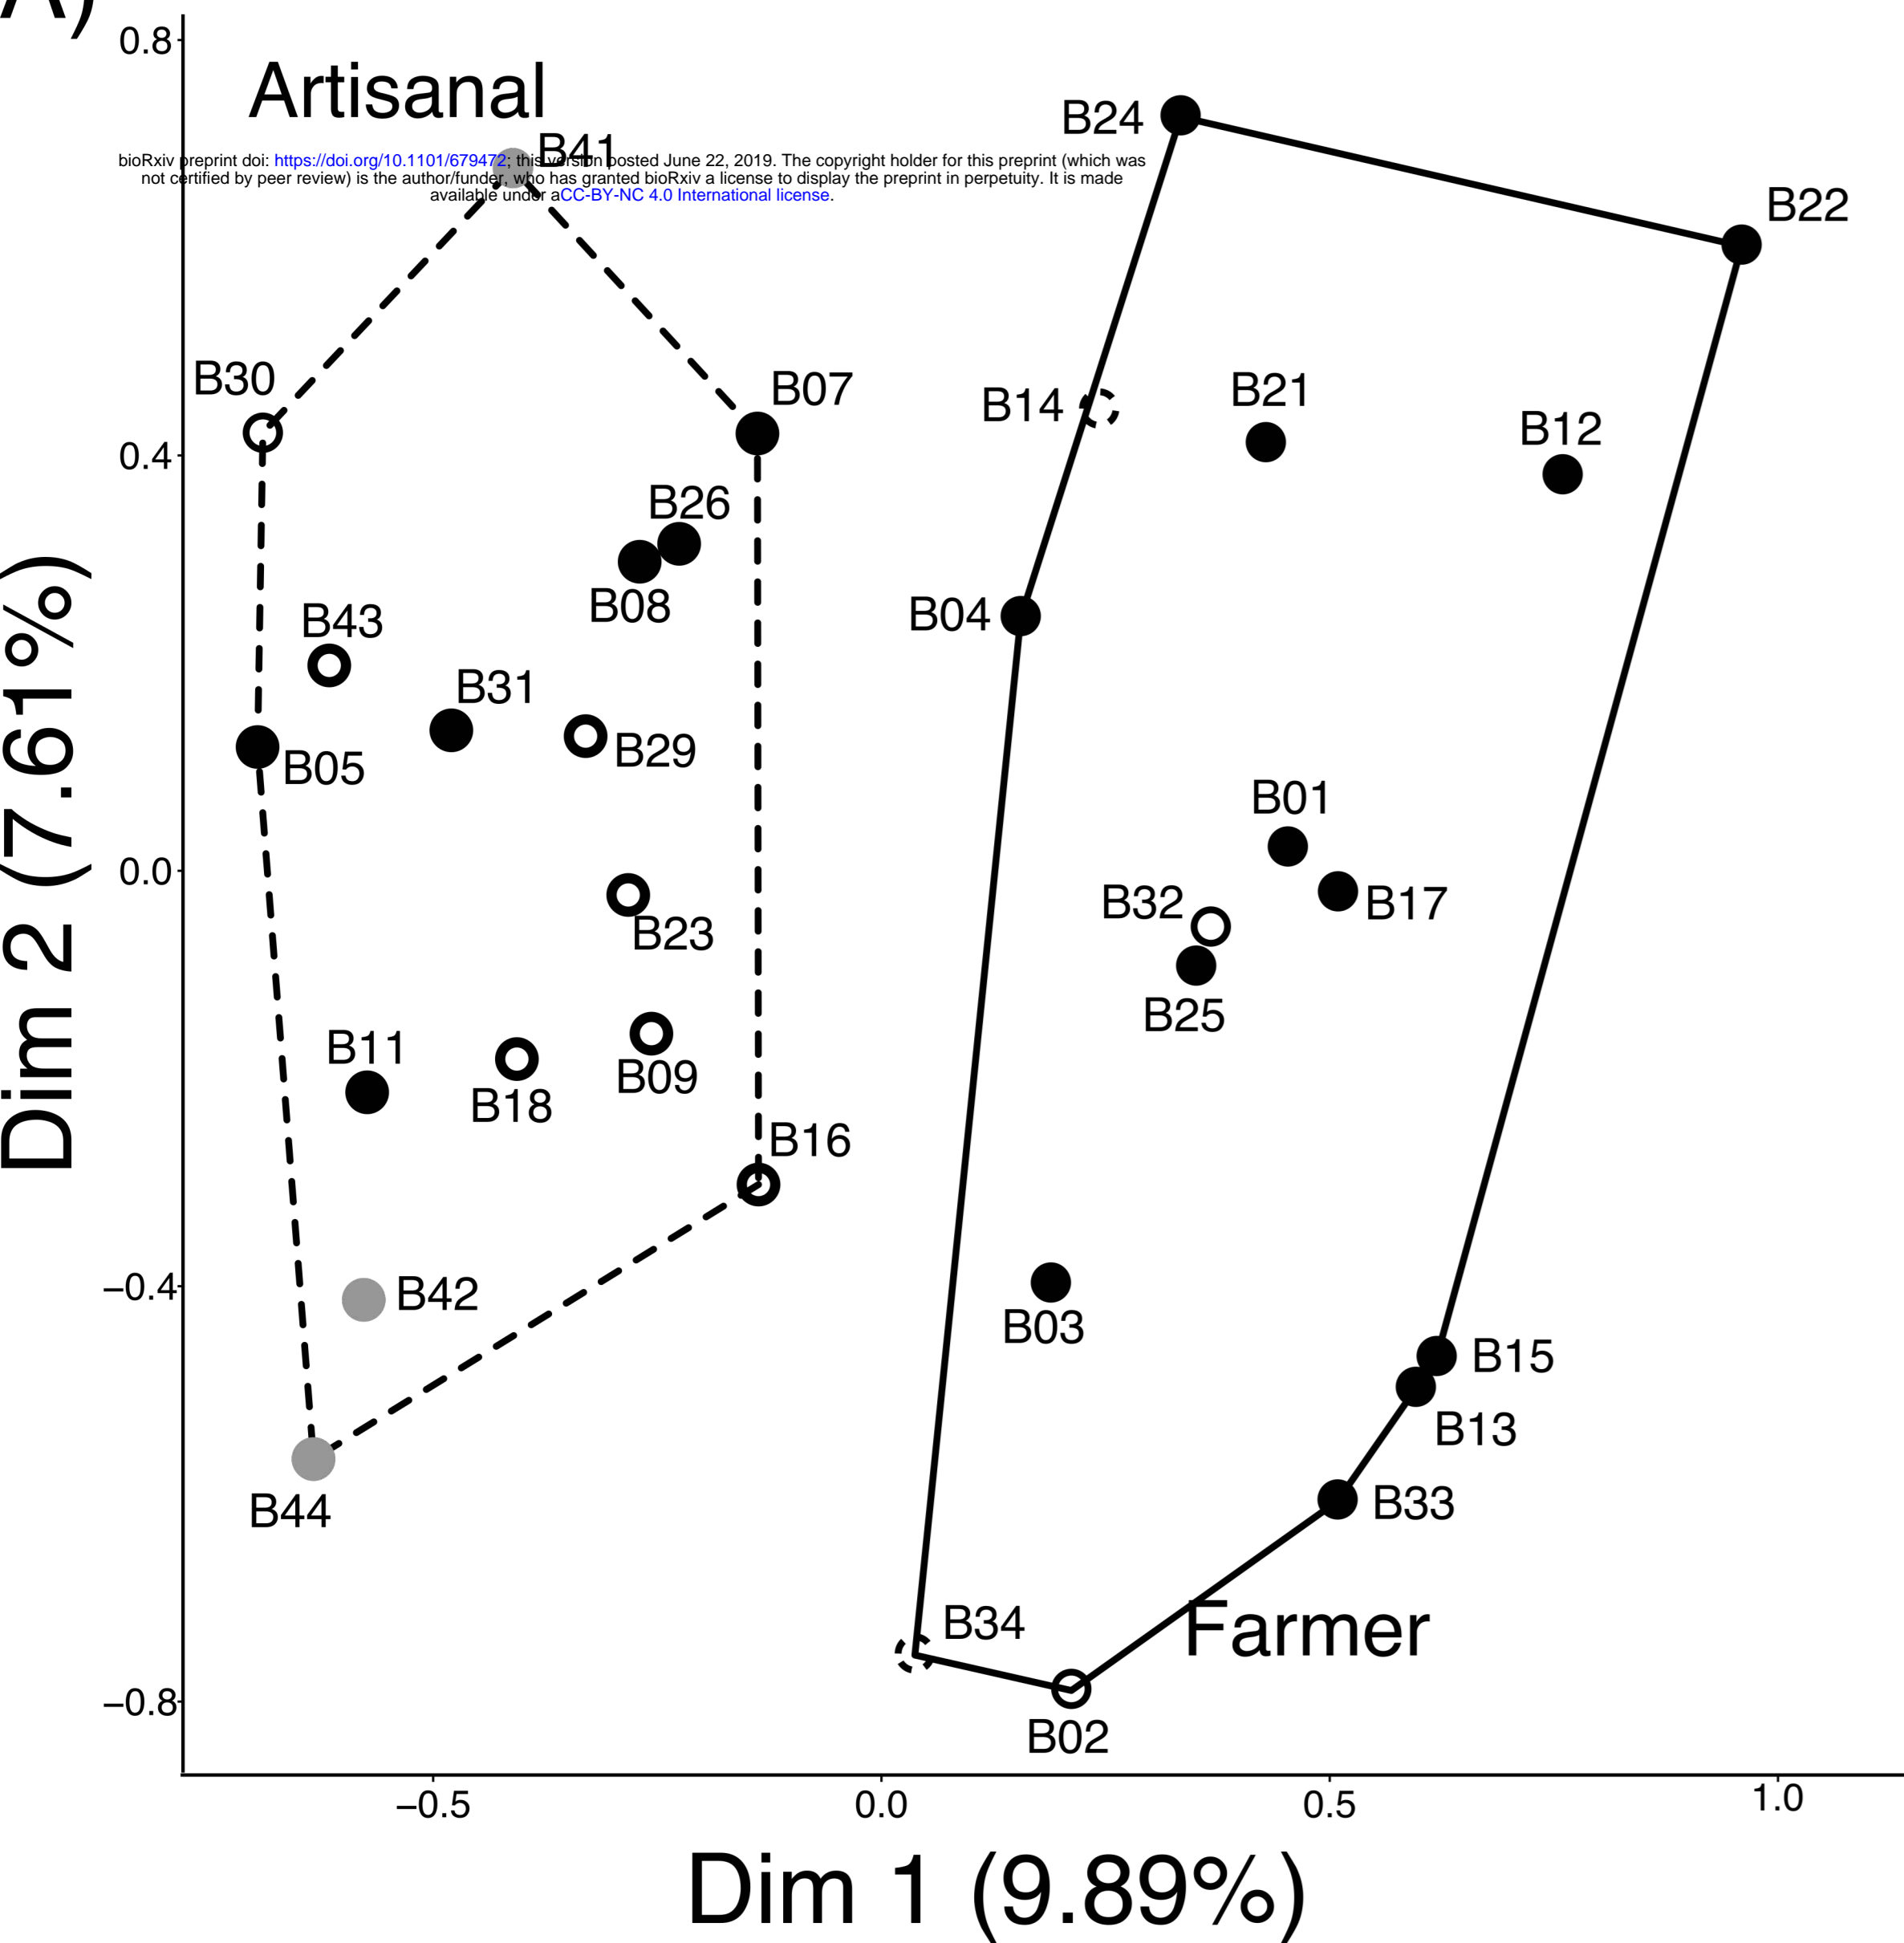

B)

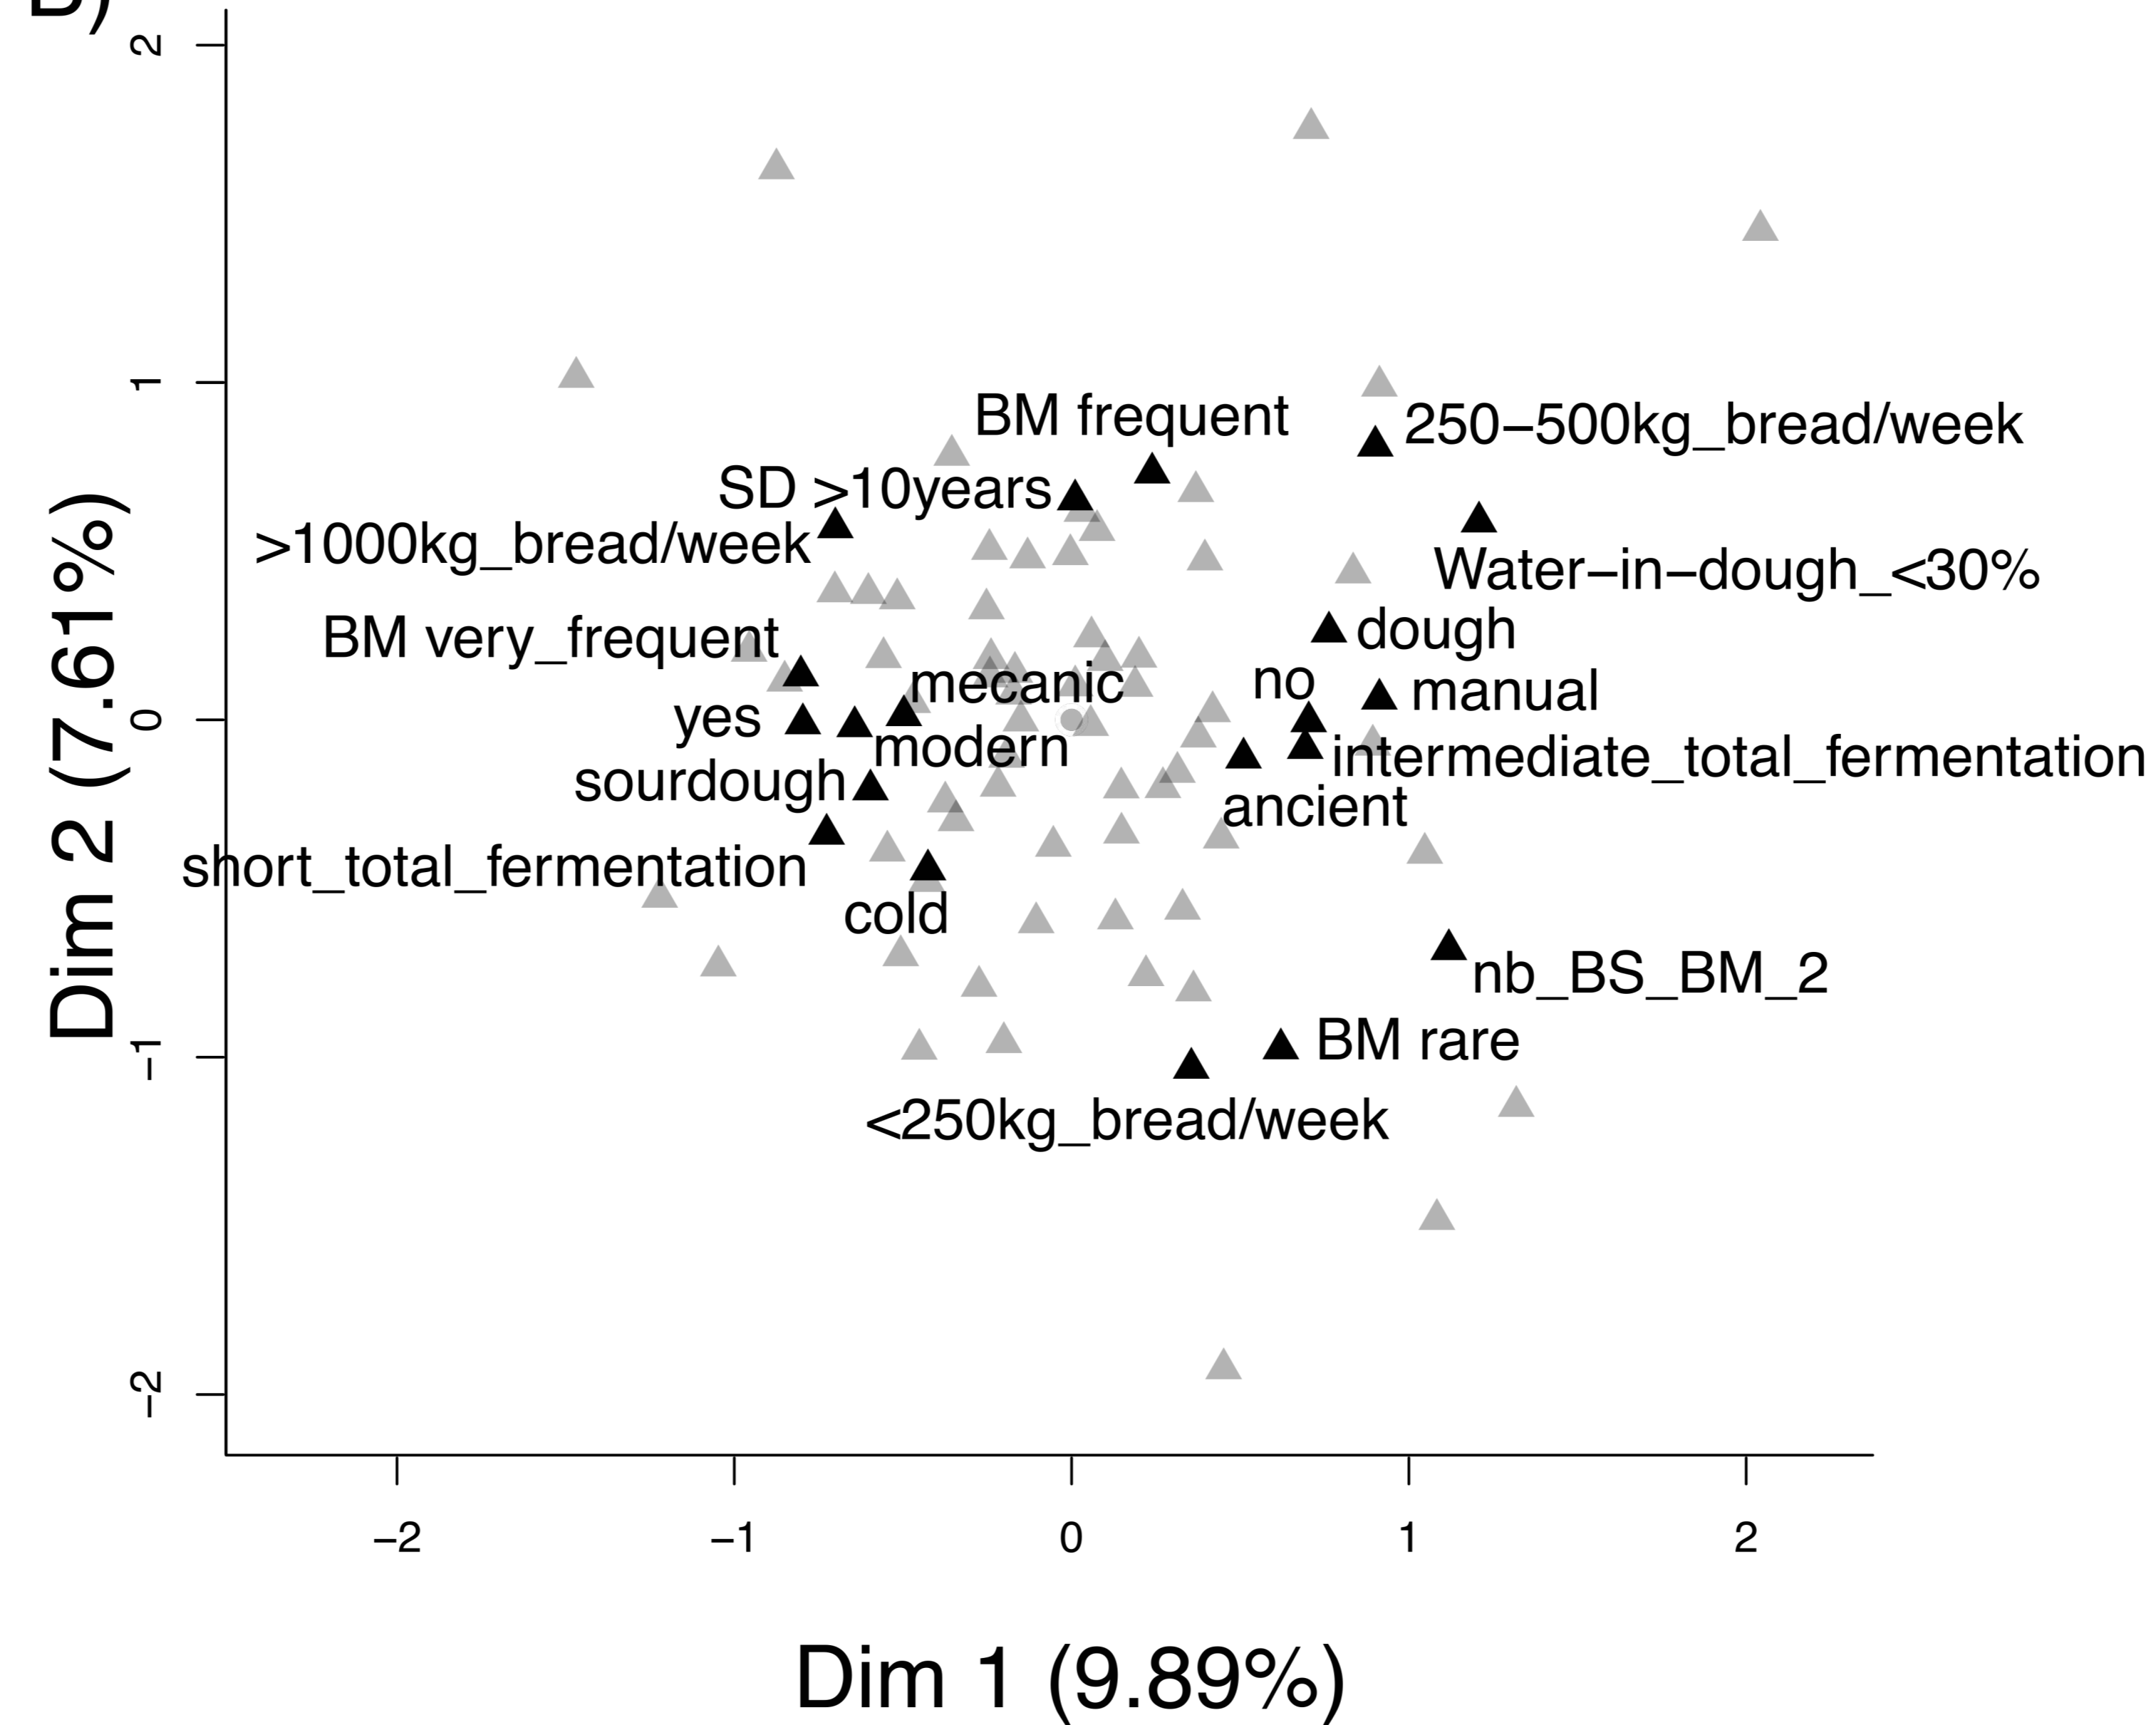

C)

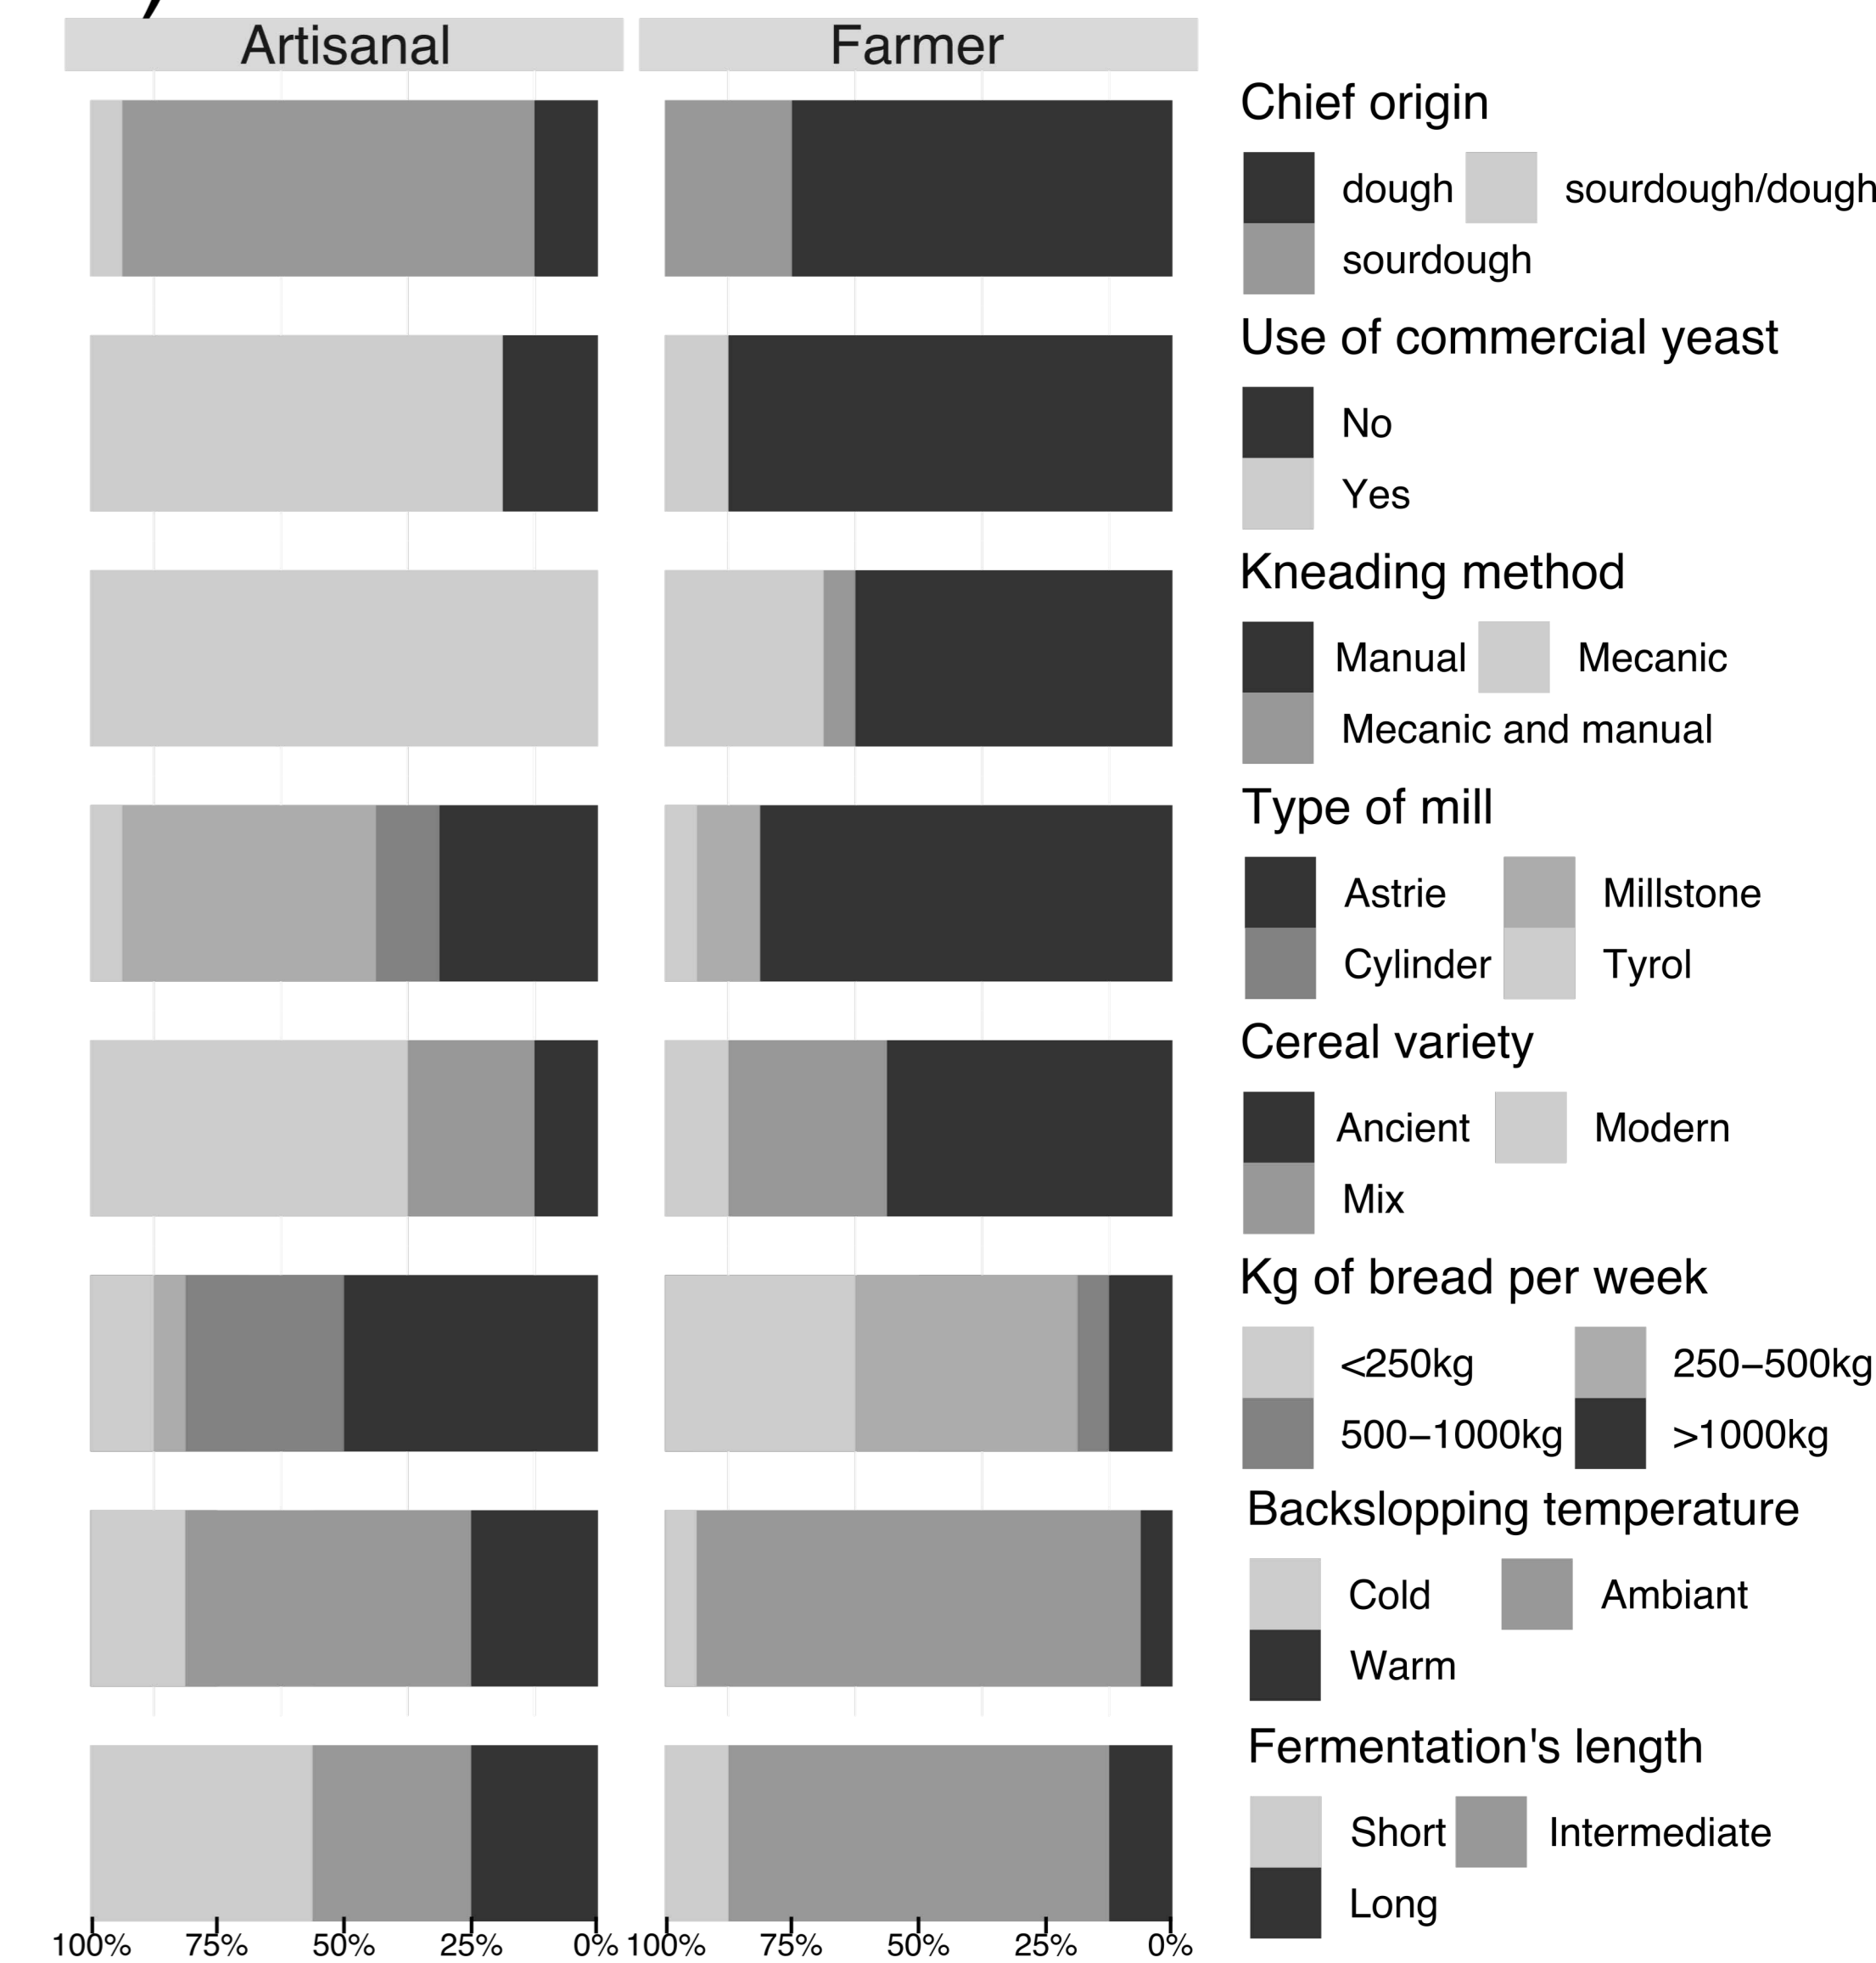

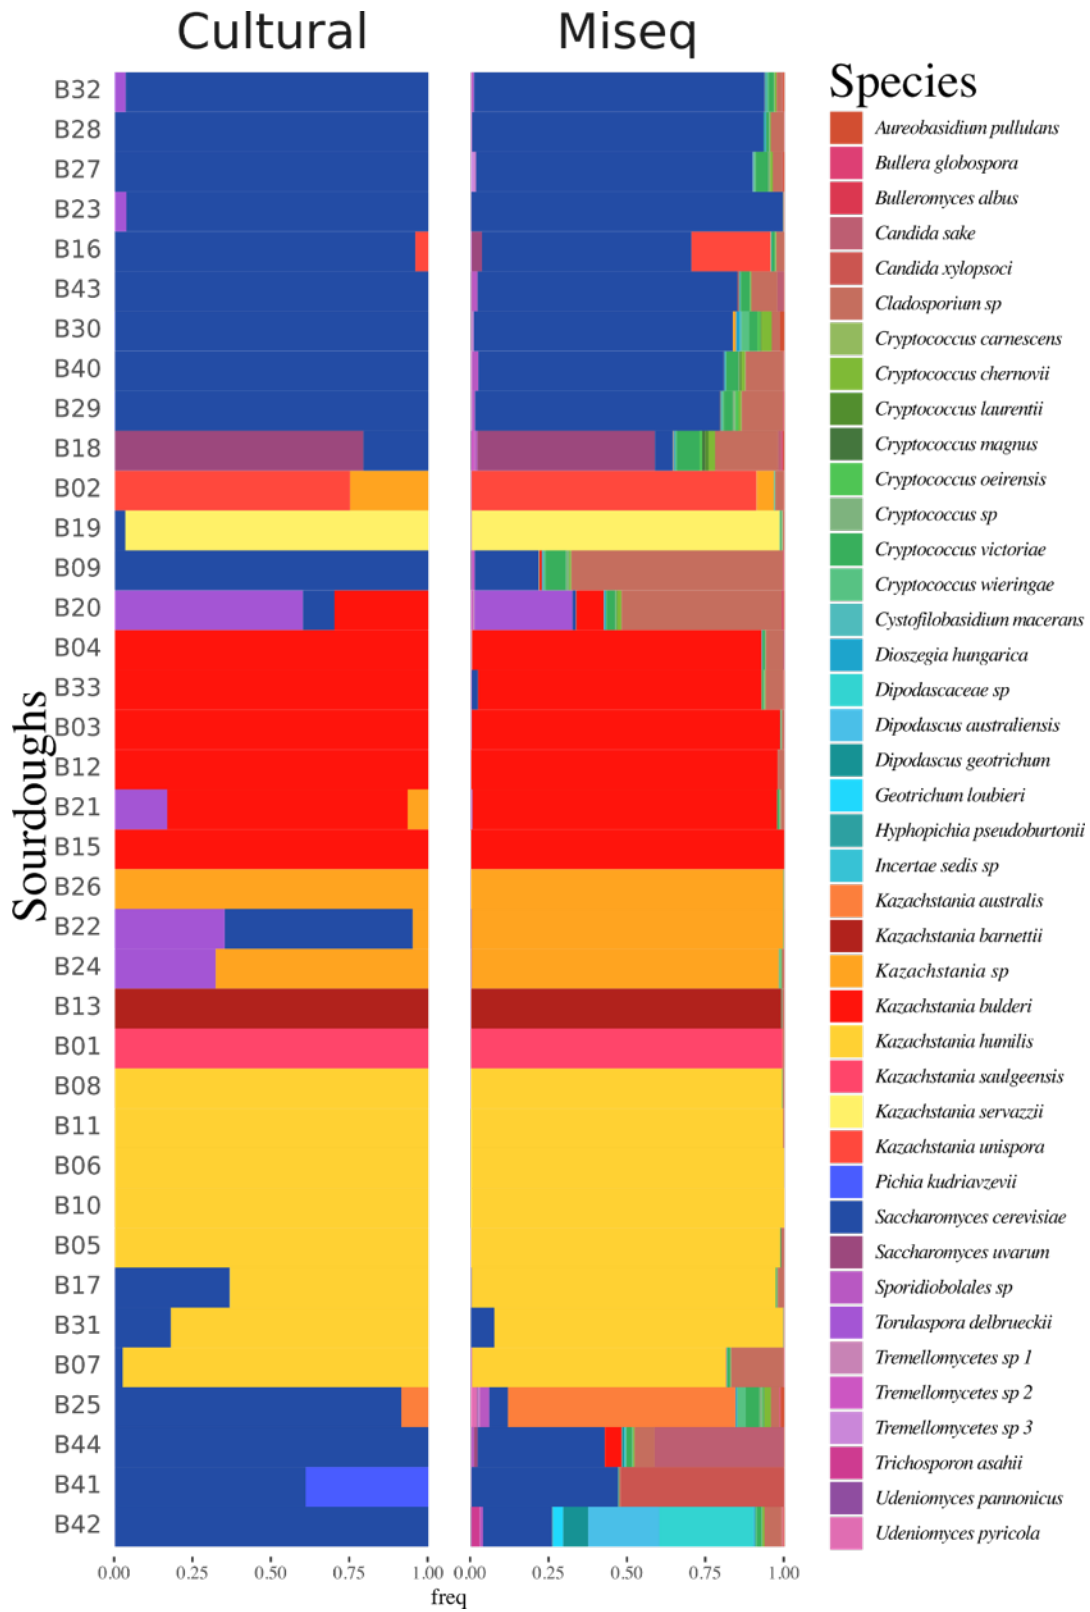

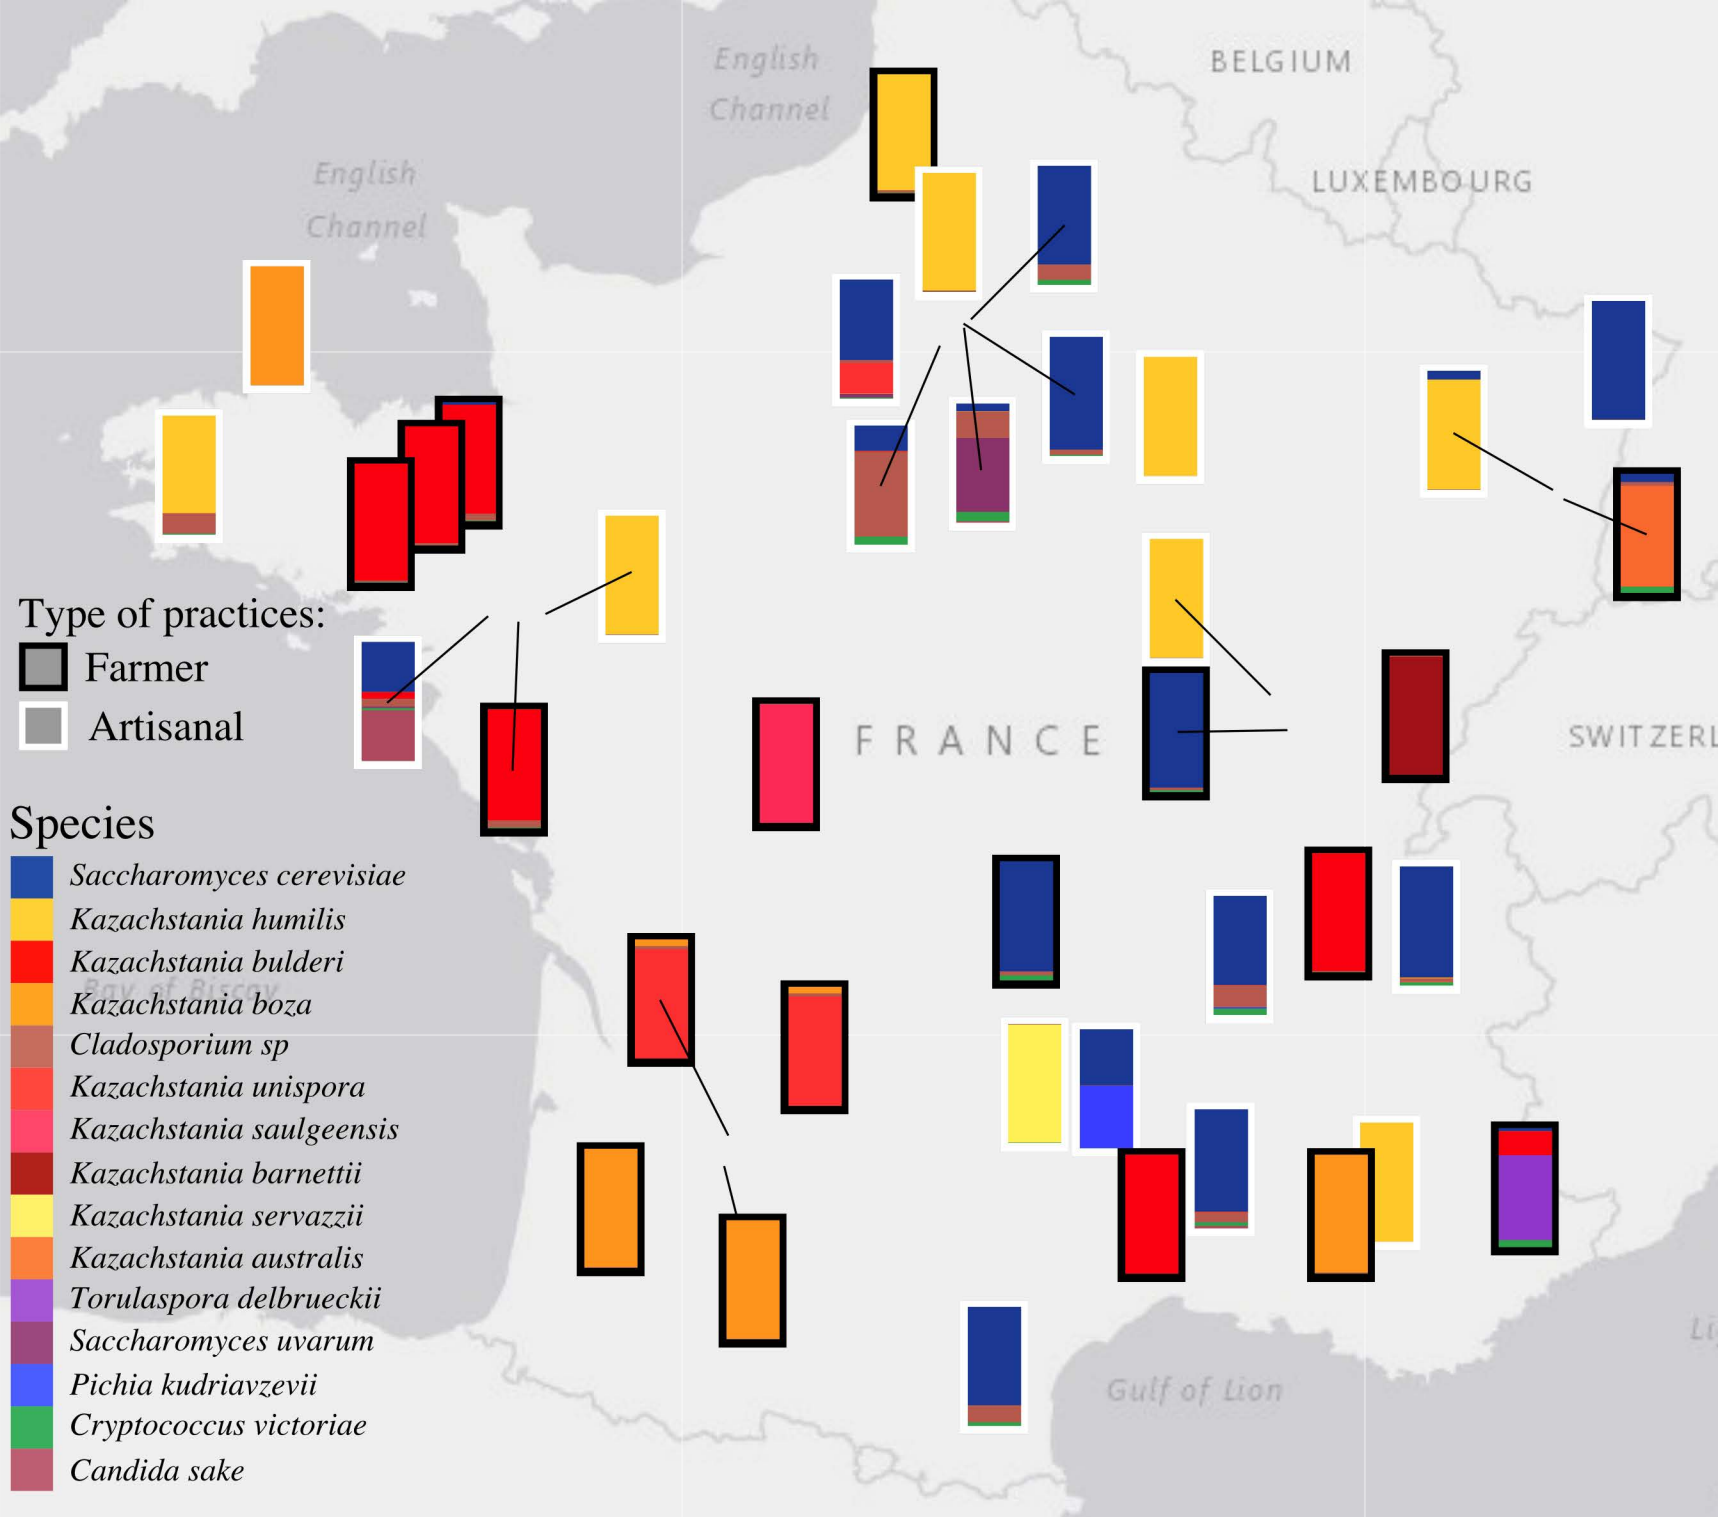

### Unifrac tree, clustered in 3 groups

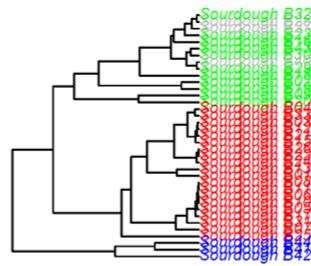

### PCoA, clustering in 3 groups

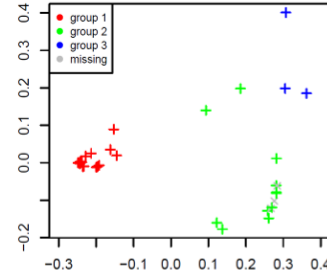

### Practices clustering

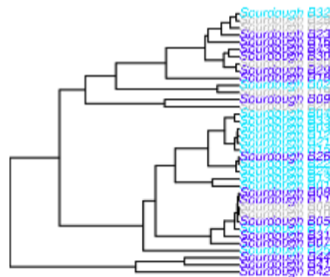

- Artisanal practices
- Farmer practices
- Missing

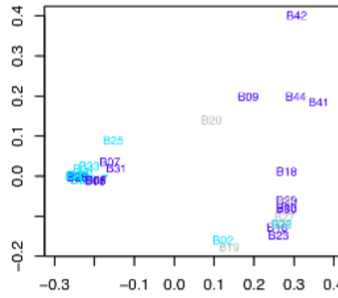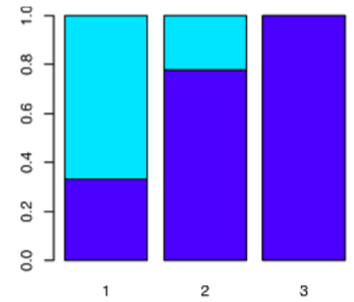

### Dominant species

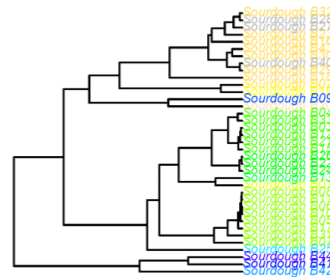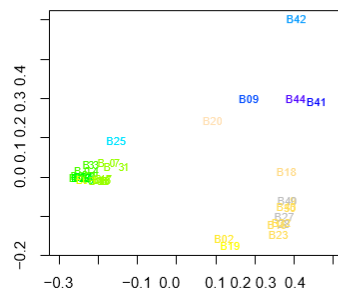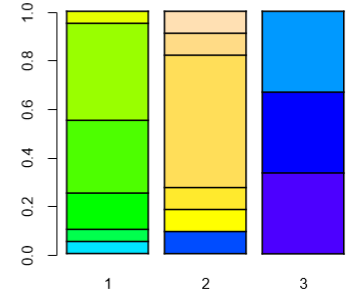

### Use of commercial yeast

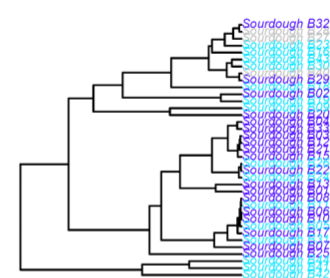

- No
- Yes
- Missing

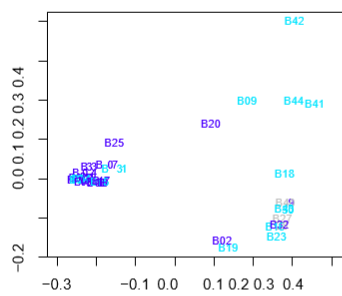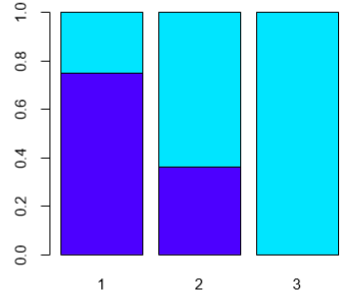

### Quantity of bread per week

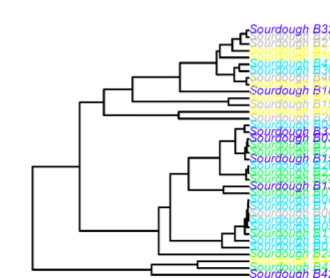

- <250kg\_bread/week
- 250-500kg\_bread/week
- 500-1000kg\_bread/week
- >1000kg\_bread/week
- missing

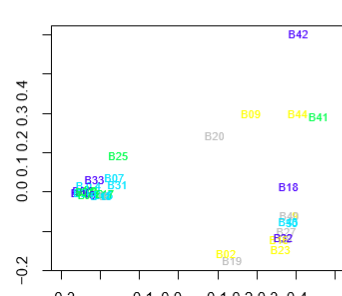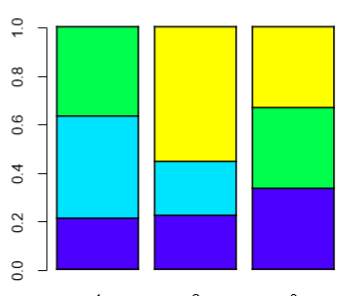

Source: https://www.biorxiv.org/content/biorxiv/early/2019/06/22/679472.full.pdf
